# Supplementary material
Source: PubMed Central journal article supplement (PMC5815496)
Supplement: NIHMS76203-supplement-Supplementary_Data.pdf [file NIHMS76203-supplement-Supplementary_Data.pdf]

## Supporting Information for:

# In vitro biocatalytic pathway design: orthogonal network for the quantitative and stereospecific amination of alcohols

Tanja Knaus<sup>‡</sup>, Luca Cariati<sup>‡</sup>, Marcelo F. Masman, Francesco G. Mutti\*

*Van 't Hoff Institute for Molecular Sciences, HIMS-Biocat, University of Amsterdam, Science Park 904, 1098 XH, The Netherlands.*

<sup>‡</sup> These authors contributed equally to the work

\* Corresponding author: [f.mutti@uva.nl](mailto:f.mutti@uva.nl)

### Table of Contents

|      |                                                                                                                                                                                                                |    |
|------|----------------------------------------------------------------------------------------------------------------------------------------------------------------------------------------------------------------|----|
| 1.   | Abbreviations .....                                                                                                                                                                                            | 2  |
| 2.   | List of substrates .....                                                                                                                                                                                       | 2  |
| 3.   | General information.....                                                                                                                                                                                       | 3  |
| 4.   | Site directed Mutagenesis.....                                                                                                                                                                                 | 4  |
| 5.   | Expression and purification of recombinant proteins in <i>E. coli</i> host cells .....                                                                                                                         | 4  |
| 5.1  | Strep-II-tagged ADH variants from <i>Thermoanaerobacter ethanolicus</i> (Strep TeS-ADH W110A and I86A W110A)4                                                                                                  |    |
| 5.2  | NADP oxidase (YcnD) from <i>Bacillus subtilis</i> and Formate dehydrogenase from <i>Candida boidinii</i> (Cb-FDH) .....                                                                                        | 5  |
| 5.3  | Amine dehydrogenases .....                                                                                                                                                                                     | 6  |
| 6.   | Calculation of the $\Delta_r G'^{\circ}$ for (A) biocatalytic hydrogen-borrowing amination (i.e. redox-interconnected steps) (B) orthogonal biocatalytic network (i.e. concurrent redox separated steps) ..... | 7  |
| 7.   | Determination of the stereoselectivity for TeS-ADH W110A and TeS-ADH I86A.....                                                                                                                                 | 10 |
| 8.   | Studies on the first oxidative cycle of the orthogonal biocatalytic network for the amination of alcohols.....                                                                                                 | 13 |
| 9.   | Initial studies on the orthogonal biocatalytic network for the asymmetric amination of alcohols .....                                                                                                          | 13 |
| 10.  | Time study for the amination of ( <i>S</i> )-1b with inversion of configuration .....                                                                                                                          | 14 |
| 11.  | Determination of the stereoselectivity for TeS-ADH I86A W110A.....                                                                                                                                             | 14 |
| 12.  | Sequence alignment between TeS-ADH and Tb-ADH.....                                                                                                                                                             | 16 |
| 13.  | <sup>1</sup> H-NMR for the scale-up of the amination of substrate <i>rac</i> -1m to give enantiopure ( <i>R</i> )-1m .....                                                                                     | 17 |
| 14.  | Analytics .....                                                                                                                                                                                                | 18 |
| 14.1 | Methods for the determination of the conversion.....                                                                                                                                                           | 18 |
| 14.2 | Methods for the determination of the enantiomeric excess .....                                                                                                                                                 | 19 |
| 15.  | GC chromatograms.....                                                                                                                                                                                          | 20 |
| 15.1 | Representative GC chromatograms for the determination of the conversions .....                                                                                                                                 | 20 |
| 15.2 | GC chromatograms for the upscaling of <b>1m</b> .....                                                                                                                                                          | 29 |
| 15.3 | GC chromatograms for the determination of the ee values.....                                                                                                                                                   | 30 |
| 16.  | References.....                                                                                                                                                                                                | 44 |

## 1. Abbreviations

|                    |                                                                                                                                                                                                         |
|--------------------|---------------------------------------------------------------------------------------------------------------------------------------------------------------------------------------------------------|
| AmDH               | amine dehydrogenase (variant)                                                                                                                                                                           |
| Bb-PhAmDH          | amine dehydrogenase variant originated from the phenylalanine dehydrogenase from <i>Bacillus badius</i> .                                                                                               |
| Rs-PhAmDH          | amine dehydrogenase variant originated from the phenylalanine dehydrogenase from <i>Rhodococcus species</i> .                                                                                           |
| Ch1-AmDH           | chimeric amine dehydrogenase generated through domain shuffling of Bb-PhAmDH variant and L-AmDH variant, the latter originated from the leucine dehydrogenase from <i>Bacillus stearothermophilus</i> . |
| YcnD               | NADPH oxidase from <i>Bacillus subtilis</i>                                                                                                                                                             |
| Cb-FDH             | formate dehydrogenase from <i>Candida boidinii</i>                                                                                                                                                      |
| TeS-ADH            | wild-type alcohol dehydrogenase from <i>Thermoanaerobacter ethanolicus</i> (also known as ADH-T)                                                                                                        |
| TeS-ADH W110A      | variant of the alcohol dehydrogenase from <i>Thermoanaerobacter ethanolicus</i>                                                                                                                         |
| TeS-ADH I86A       | variant of the alcohol dehydrogenase from <i>Thermoanaerobacter ethanolicus</i>                                                                                                                         |
| TeS-ADH I86A W110A | variant of the alcohol dehydrogenase from <i>Thermoanaerobacter ethanolicus</i>                                                                                                                         |
| LB-ADH             | wild-type alcohol dehydrogenase from <i>Lactobacillus brevis</i>                                                                                                                                        |
| <i>ee</i>          | enantiomeric excess                                                                                                                                                                                     |
| n.a.               | not applicable                                                                                                                                                                                          |
| n.d.               | not determined                                                                                                                                                                                          |
| n.m.               | not measureable                                                                                                                                                                                         |

## 2. List of substrates

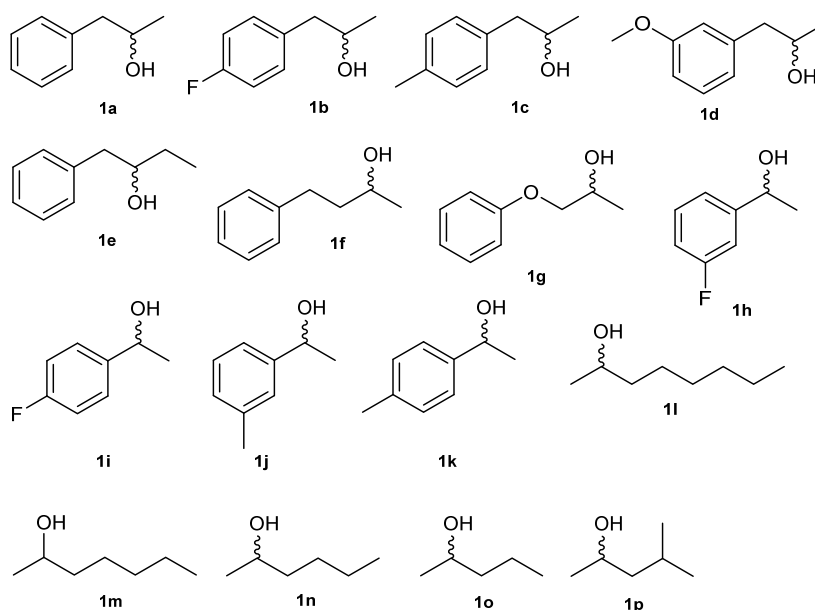

Figure S1. Secondary alcohols tested in this study.

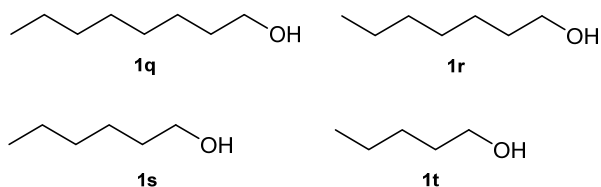

**Figure S2.** Primary alcohols tested in this study.

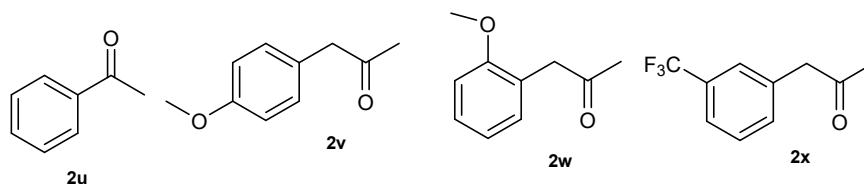

**Figure S3.** Additional ketones tested with TeS-ADH W110A, I86A and I86A W110A.

### 3. General information

Ketones **2a, b, e-i, l-p** were purchased from Sigma-Aldrich (Steinheim, Germany). Ketones **2c, d, j, k**, were purchased from Alfa Aesar (Shore Road, Heysham, UK).

Aldehydes **2q-t** were purchased from Sigma-Aldrich (Steinheim, Germany).

Racemic secondary alcohols **1a, f, i-p** primary alcohols **1q-t** were purchased from Sigma-Aldrich (Steinheim, Germany). Racemic secondary alcohols **1b-e, g, h** were chemically synthesised by reduction with  $\text{LiAlH}_4$  from the related ketones. Enantiopure secondary alcohols (*S*)-**1a, i, l-o** and enantiopure secondary alcohols (*R*)-**1a, i**, were purchased from Sigma-Aldrich (Steinheim, Germany). Enantiopure secondary alcohols (*S*)-**1b-h, j, k, p** and (*R*) **1b-h, j-p** were synthesised by enzymatic reduction of the related ketones with stereocomplementary ADHs according to procedures reported in literature.<sup>1</sup>

Enantiopure (*R*), (*S*) or racemic amines **3f, i, o, p**, and non-chiral amines **3q-t** were purchased from Sigma-Aldrich (Steinheim, Germany). Enantiopure (*S*) and (*R*) amines **3a-e, g, h, j-n** were synthesised by stereoselective amination using established enzymatic methods (commercially available stereocomplementary  $\omega$ -transaminases).<sup>2</sup>

Nicotinamide cofactors (NADH and  $\text{NAD}^+$ ) were purchased from Melford Biolaboratories (Chelworth, Ipswich, UK).

Catalase from bovine liver was purchased by Sigma-Aldrich (lyophilized powder,  $>10000 \text{ U mg}^{-1}$  of protein). Catalase (50 U) was added to the reactions from a stock solution previously prepared in aqueous buffer (5  $\mu\text{L}$  of stock solution  $1 \text{ mg mL}^{-1}$ ). The concentration of the catalase in the reaction mixture (ca.  $0.2 \mu\text{M}$ ) was calculated considering the MM of the monomer (60 kDa) since each monomer contains a catalytic iron site.

$\text{Ni}^{2+}$  affinity columns (HisTrap FF, 5 mL) and Strep-tag columns (StrepTrap HP, 5 mL) were purchased from GE Healthcare Bio-Sciences (Munich, Germany).

Biotinylated thrombin was purchased from Merck.

#### 4. Site directed Mutagenesis

The three TeS-ADH variants were obtained by site directed mutagenesis using the QuickChange II Site-Directed Mutagenesis Kit (Agilent Technologies) according to the protocol of the supplier and by using following template DNA (already subcloned into pET21a):

>TeS-ADH

```
CATATGAAAGGTTTTGCAATGCTGAGCATTGGTAAAGTTGGCTGGATTGAAAAAGAAAAACCGGCACCGGGTCCG
TTTGATGCAATTGTTTCGTCGCCCTGGCAGTTGCACCGTGTACCAGCGATATTCATACCGTTTTTGAAGGTGCAATT
GGCGAACGCCATAATATGATTCTGGGTCATGAAGCAGTTGGTGAAGTTGTTGAAGTTGGTAGCGAAGTGAAAGAT
TTTAAACCGGGTGATCGTGTGTTGTTCCGGCAATTACACCGGATTGGTGGACCAGCGAAGTTCAGCGTGGTTAT
CATCAGCATAGCGGTGGTATGCTGGCAGGTTGGAAATTTAGCAATGTTAAAGATGGCGTGTGGCGAATTTTTTT
CATGTTAATGATGCCGATATGAATCTGGCACATCTGCCGAAAGAAAATCCGCTGGAAGCAGCAGTTATGATTCCG
GATATGATGACCACCGTTTTTCATGGTGCAGAACTGGCAGATATTGAACTGGGTGCAACCGTTGCAGTTCCTGGGT
ATTGGTCCGGTTGGTCTGATGGCAGTTGCCGGTGCAAACTGCGTGGTGCAGTTCGTATTATTGCAGTTGGTAGC
CGTCCGGTTTTGTGTTGATGCAGCAAAATACTATGGTGCACCGATATTGTGAATTATAAAGATGGTCCGATTGAA
AGCCAGATTATGAATCTGACCGAAGGTAAAGGTGTTGATGCCGCAATTATTGCCGGTGGTAAATGCAGATATCATG
GCAACCGCAGTGAAAATTGTGAAAACCGGGTGGCACCATTGCCAATGTTAATTATTTGGTGAAGGTGAAGTTCTG
CCGGTTCCCGCTCTGGAATGGGGTTGTGGTATGGCACATAAAACCATTAAGGTGGTCTGTGTCCGGGTGGTCTGT
CTGCGTATGGAACGTCTGATTGATCTGGTTTTTTTATAAAACCGGTGGATCCGAGCAAACCTGGTTACCCATGTTTTT
CAGGGCTTTGATAATATTGAAAAAGCCTTTATGCTGATGAAAAGATAAACCGAAAGATCTGATTAAACCGGTTGTT
ATTCTGGCAAGCGCTTGGAGCCACCCGCAGTTTCGAAAAATAACTAGAG
```

Following primers have been used:

|                   |                                           |
|-------------------|-------------------------------------------|
| ADH-TE I86A_forw  | GTTGTTGTTCCGGCAGCTACACCGGATTGGTGG         |
| ADH-TE I86A_rev   | CCACCAATCCGGTGTAGCTGCCGGAACAACAAC         |
| ADH-TE W110A_forw | GGTGGTATGCTGGCAGGTGCGAAAATTTAGCAATGTTAAAG |
| ADH-TE W110A_rev  | CTTTAACATTGCTAAATTTTCGCACCTGCCAGCATACCACC |

For the double variant, both primer pairs were added to the PCR reaction mixture.

After verifying positive clones by sequencing, *E. coli* C43 cells were transformed with the DNA and used as host for expression of the proteins.

#### 5. Expression and purification of recombinant proteins in *E. coli* host cells

##### 5.1 Strep-II-tagged ADH variants from *Thermoanaerobacter ethanolicus* (Strep TeS-ADH W110A and I86A W110A)

The C-terminal Strep-II-tagged TeS-ADH variants W110A and I86A W110A - subcloned in pET21a - were expressed in *E. coli* C43 cells. Cells were grown at 37 °C until an OD<sub>600</sub> of ca. 0.7 was reached prior to the addition of IPTG (final concentration 0.5 mM) and expression was carried out at 20 °C over night. Cultures were harvested, centrifuged and the pellet was washed with an aqueous solution of NaCl (0.9% w w<sup>-1</sup>). Cells were then resuspended in binding buffer (142 mL, pH 8.0, Tris-HCl 100 mM, NaCl 150 mM, NADP<sup>+</sup> 0.1 mM, dithiothreitol (DTT) 0.5 mM, phenylmethylsulfonyl fluoride (PMSF) 1 mM, DNase 1.32 mg from aqueous stock solution) and disrupted by sonication. Protein purification was performed by Strep-tactin affinity chromatography using pre-packed StrepTrap HP columns (GE Healthcare). After loading of the

filtered lysate on the equilibrated column, the column was washed with sufficient amounts of binding buffer and bound protein was recovered with elution buffer (pH 8.0, Tris-HCl 100 mM, NaCl 150 mM, d-thiobiotin 2.5 mM, NADP<sup>+</sup> 0.1 mM). After SDS-PAGE, fractions containing the desired proteins in a sufficient purity were pooled and buffer exchange was carried out with PD10 columns in Tris-HCl buffer (100 mM, pH 8.0, NADP<sup>+</sup> 0.1 mM). Proteins were concentrated using Centrprep (Millipore) and their final concentrations determined at 280 nm ( $\epsilon_{280} = 36,600 \text{ M}^{-1} \text{ cm}^{-1}$ , MW = 38.6 kDa). 1.4 mg and 1.7 mg purified protein per g wet cells were obtained for TeS-ADH W110A and I86A W110A, respectively, which were frozen in liquid nitrogen and stored at -80 °C.

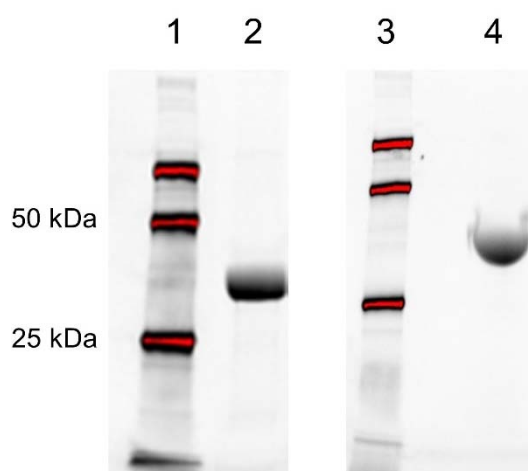

**Figure S4.** SDS-PAGE of purified Strep-II-tagged TeS-ADHs. Lane 1 and 3: Biorad Precision Plus Protein™ Unstained Standard, lane 2: Strep TeS-ADH W110A, lane 4: Strep TeS-ADH I86A W110A.

## 5.2 NADP oxidase (YcnD) from *Bacillus subtilis* and Formate dehydrogenase from *Candida boidinii* (Cb-FDH)

BL21 DE3 cells containing the plasmid for the expression of YcnD and Cb-FDH (pET21a, no Tag) were grown at 37 °C until an OD<sub>600</sub> of 0.6 to 0.8 was reached. The expression of the protein was initiated by the addition of IPTG (final concentration 0.5 mM) and carried out at 25 °C overnight. Cells were harvested by centrifugation and washed with an aqueous solution of NaCl (0.9% w w<sup>-1</sup>).

The non-tagged proteins were purified by anion exchange chromatography using a HiPrepQ HP 16/10 column (GE Healthcare). The pellets were dissolved in start buffer (20 mM Tris/HCl, pH 8.0 buffer), a tiny spatula of FMN was added to the YcnD protein solution and after cell disruption and centrifugation the lysates were loaded onto the column and washed with start buffer until the absorbance went down to zero. The elution of the proteins was performed with a gradient between start buffer and elution buffer (20 mM Tris/HCl, 1M NaCl, pH 8.0 buffer).

After SDS-PAGE, fractions containing the desired protein in a sufficient purity were pooled and dialyzed against 50 mM phosphate buffer (pH 8.0) overnight, and concentrated using Centrprep (Millipore). The final concentration was determined spectrophotometrically at 280 nm for Cb-FDH ( $\epsilon_{280} = 51,400 \text{ M}^{-1} \text{ cm}^{-1}$ , MW = 40.3 kDa) or for YcnD using the wavelength/extinction coefficient for the protein bound flavin (approx. 450 nm/12,190 M<sup>-1</sup> cm<sup>-1</sup>, MW = 28.9 kDa) as determined by Morokutti et al. <sup>3</sup> Approximately 4 mg and 34 mg pure protein per g wet cells were obtained for YcnD and Cb-FDH, respectively, which were frozen in liquid nitrogen and stored at -80 °C.

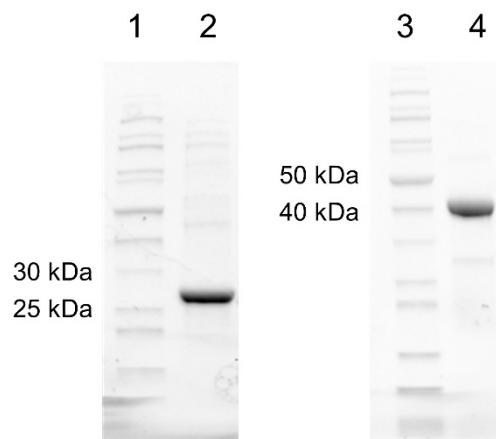

**Figure S5.** SDS-PAGE of purified YcnD and Cb-FDH. Lane 1 and 3: PageRuler™ Unstained Protein Ladder (Thermo Fisher Scientific), lane 2: YcnD, lane 4: Cb-FDH.

### 5.3 Amine dehydrogenases

The amine dehydrogenases Bb-PhAmDH and Ch1-AmDH were expressed and purified as His<sub>6</sub>-tagged recombinant enzymes as described previously.<sup>4</sup> When required, the His<sub>6</sub>-tag was cleaved following the previous protocol.<sup>4</sup> Rs-PhAmDH was expressed and purified as His<sub>6</sub>-tagged recombinant enzyme as described previously.<sup>5</sup> When required, the His<sub>6</sub>-tag was cleaved as follows.

A solution of His<sub>6</sub>-tagged Rs-PhAmDH (70 mg of enzyme in ca. 1.4 mL of potassium phosphate buffer pH 8.0, 50 mM) was added to the cleavage buffer (20 mL, 20 mM Tris-HCl pH 8.4, 150 mM NaCl, 2.5 mM CaCl<sub>2</sub>). A solution of biotinylated thrombin was then added (2.8 U). The mixture was incubated at 20 °C for 2 h. Partial precipitation was observed. SDS electrophoresis showed that the cleavage of the His<sub>6</sub>-tag was not complete. Thus, a second aliquot of biotinylated thrombin was added (2.8 U) and incubation was prolonged for other 2 h.

The residual thrombin present in the solution was removed by the addition of streptavidin agarose beads (192 µL of 50% slurry). The beads were then removed by initial centrifugation (4,000 rpm, 10 min, 4 °C) and subsequent further filtration of the supernatant. The final solution contained a mixture of His<sub>6</sub>-tagged Rs-AmDH, Rs-AmDH devoid of His<sub>6</sub>-tag and free His<sub>6</sub>-tag. The fraction of His<sub>6</sub>-tagged Rs-AmDH and the free His<sub>6</sub>-tag were removed through Ni<sup>2+</sup> affinity chromatography. The final solution of highly pure Rs-AmDH devoid of the His-tag was dialyzed overnight in phosphate buffer (pH 8.0, 50 mM), concentrated, frozen in liquid nitrogen and stored at -80 °C. The enzyme concentration was measured spectrophotometrically ( $\epsilon_{280} = 26,500 \text{ M}^{-1} \text{ cm}^{-1}$ , MW = 36.7 kDa). The amount of recovered Rs-AmDH devoid of His<sub>6</sub>-tag was 29 mg.

**6. Calculation of the  $\Delta_r G'^\circ$  for (A) biocatalytic hydrogen-borrowing amination (i.e. redox-interconnected steps) (B) orthogonal biocatalytic network (i.e. concurrent redox separated steps)**

$\Delta_r G^\circ$  is the change in Gibbs free energy due to a chemical reaction in standard conditions (T 298.15 K, P 1 bar) and without accounting for pH and ionic strength.  $\Delta_r G'^\circ$  represents the change in Gibbs free energy due to a chemical reaction in standard conditions considering a particular pH and ionic strength. In this case we set pH 8.5 and ionic strength 1 M in water as solvent. We chose these conditions as they are analogous to the experimental conditions applied for cascade A (previous work)<sup>4</sup> and cascade B (the present work).

The calculations were performed with the aid of eQuilibrator, a tool made available by Milo Lab at the Weizmann Institute in Rehovot, Israel.<sup>6</sup> eQuilibrator uses a well-studied approximation of  $\Delta_r G$  (the  $\Delta G$  related to the formation of a given molecule from its components) called group contribution, enabling thermodynamic analysis of many biochemical reactions and pathways.<sup>7</sup> eQuilibrator also allows for manipulation of the conditions of a reaction - pH, ionic strength, and reactant and product concentrations - to help exploring the thermodynamic landscape of a biochemical reaction. Currently, eQuilibrator can provide estimates for many compounds in the KEGG database (about 4500).<sup>8</sup>

For simplicity, the calculations were performed using 2-propanol, acetone and 2-propylamine for a representative amination of a secondary alcohol. 1-Butanol, butanal and 1-butylamine were considered in the calculation of a representative amination of primary alcohols.

The calculations of the  $\Delta_r G'^\circ$  values are reported in the tables below

The equilibrium constant for the overall reactions was also calculated as follows:

$$\Delta_r G'^\circ = -RT \ln K'_{eq}$$

where

$\Delta_r G'^\circ$  is the calculated free Gibbs energy of the reaction in standard conditions and in aqueous buffer at pH 8.5, ionic strength 1 M

$R = 0.00831447 \text{ KJ mol}^{-1} \text{ K}^{-1}$

$T = 298.15 \text{ K}$

$K'_{eq}$  is the equilibrium constant for the reaction in aqueous buffer at pH 8.5, ionic strength 1 M

Cascade A

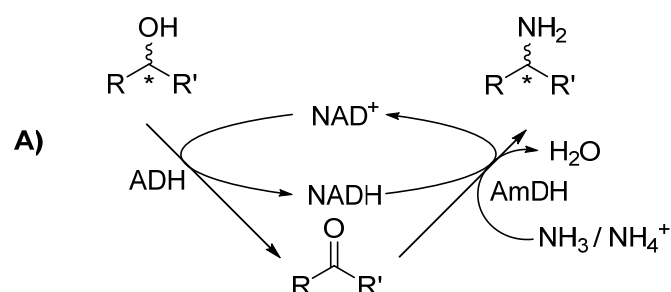

**Scheme S1** Biocatalytic hydrogen-borrowing amination (i.e. redox-interconnected steps) for the one-pot conversion of alcohols to enantiopure amines employing alcohol dehydrogenases (ADHs) and amine dehydrogenases (AmDHs); previous work.

**Table S1.** Thermodynamic calculation for the hydrogen-borrowing amination of secondary alcohols

| Equation                                                                                    | $\Delta_r G^\circ$ [KJ mol <sup>-1</sup> ] <sup>(a)</sup> |
|---------------------------------------------------------------------------------------------|-----------------------------------------------------------|
| 2-propanol + NAD <sup>+</sup> => acetone + NADH                                             | - 3.1 ± 0.7                                               |
| acetone + NADH + NH <sub>3(aq)</sub> => 2-propylamine + NAD <sup>+</sup> + H <sub>2</sub> O | 2.5 ± 5.7                                                 |
| <b>Combination: hydrogen-borrowing amination</b>                                            | <b>- 0.6 ± 6.4</b>                                        |

<sup>(a)</sup> calculated in aqueous buffer at pH 8.5 and ionic strength 1 M

$$K'_{eq} = 1.27$$

**Table S2.** Thermodynamic calculation for the hydrogen-borrowing amination of primary alcohols

| Equation                                                                                   | $\Delta_r G^\circ$ [KJ mol <sup>-1</sup> ] <sup>(a)</sup> |
|--------------------------------------------------------------------------------------------|-----------------------------------------------------------|
| 1-butanol + NAD <sup>+</sup> => butanal + NADH                                             | 13.7 ± 4.8                                                |
| butanal + NADH + NH <sub>3(aq)</sub> => 1-butylamine + NAD <sup>+</sup> + H <sub>2</sub> O | - 20.5 ± 6.2                                              |
| <b>Combination: hydrogen-borrowing amination</b>                                           | <b>- 6.8 ± 11</b>                                         |

<sup>(a)</sup> calculated in aqueous buffer at pH 8.5 and ionic strength 1 M

$$K'_{eq} = 15.53$$

### Cascade B

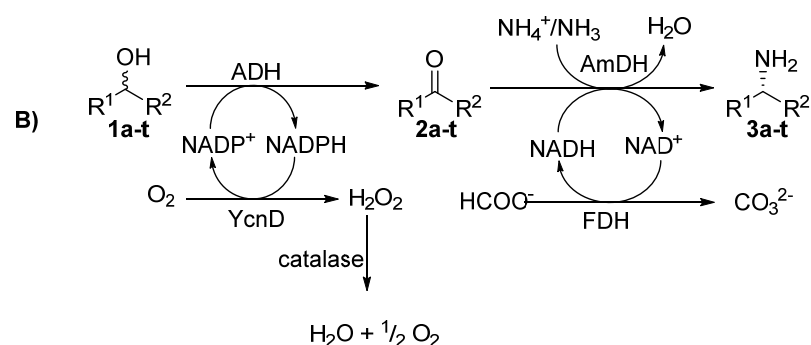**Scheme S2.** Orthogonal biocatalytic network (i.e. concurrent redox separated steps) for the one-pot conversion of alcohols to enantiopure amines employing alcohol dehydrogenases (ADHs) and amine dehydrogenases (AmDHs).**Table S3.** Thermodynamic calculation for the orthogonal, oxidation-reduction amination of secondary alcohol: the oxidative step

| Equation                                                                        | $\Delta_r G^\circ$ [KJ mol <sup>-1</sup> ] <sup>(a)</sup> |
|---------------------------------------------------------------------------------|-----------------------------------------------------------|
| 2-propanol + NADP <sup>+</sup> => acetone + NADPH                               | - 4.1 ± 0.6                                               |
| O <sub>2(aq)</sub> + NADPH => H <sub>2</sub> O <sub>2</sub> + NADP <sup>+</sup> | - 121.8 ± 8.3                                             |
| H <sub>2</sub> O <sub>2</sub> => ½ O <sub>2(aq)</sub> + H <sub>2</sub> O        | - 96.5 ± 6.7                                              |
| <b>Combination: oxidative step, orthogonal cascade</b>                          | <b>- 222.4 ± 15.6</b>                                     |

<sup>(a)</sup> calculated in aqueous buffer at pH 8.5 and ionic strength 1 M



**Table S4.** Thermodynamic calculation for the orthogonal, oxidation-reduction amination of secondary alcohol: the reductive amination step

| Equation                                                                                    | $\Delta_r G'^{\circ}$ [KJ mol <sup>-1</sup> ] <sup>(a)</sup> |
|---------------------------------------------------------------------------------------------|--------------------------------------------------------------|
| acetone + NADH + NH <sub>3(aq)</sub> => 2-propylamine + NAD <sup>+</sup> + H <sub>2</sub> O | 2.5 ± 5.7                                                    |
| formate + NAD <sup>+</sup> => CO <sub>2(aq)</sub> + NADH                                    | - 15.1 ± 6.5                                                 |
| <b>Combination: reductive amination step, orthogonal cascade</b>                            | <b>- 12.6 ± 12.2</b>                                         |

<sup>(a)</sup> calculated in aqueous buffer at pH 8.5 and ionic strength 1 M

**Table S5.** Thermodynamic calculation for the orthogonal, oxidation-reduction amination of secondary alcohol: the overall cascade

| Steps                                           | $\Delta_r G'^{\circ}$ [KJ mol <sup>-1</sup> ] <sup>(a)</sup> |
|-------------------------------------------------|--------------------------------------------------------------|
| Combination: oxidative step, orthogonal cascade | - 222.4 ± 15.6                                               |
| Combination: reductive step, orthogonal cascade | - 12.6 ± 12.2                                                |
| <b>Combination: overall orthogonal cascade</b>  | <b>- 235.0 ± 27.8</b>                                        |

<sup>(a)</sup> calculated in aqueous buffer at pH 8.5 and ionic strength 1 M

For the overall orthogonal cascade: **K'eq = 1.48 x 10<sup>41</sup>**

**Table S6.** Thermodynamic calculation for the orthogonal, oxidation-reduction amination of primary alcohol: the oxidative step

| Equation                                                                        | $\Delta_r G'^{\circ}$ [KJ mol <sup>-1</sup> ] <sup>(a)</sup> |
|---------------------------------------------------------------------------------|--------------------------------------------------------------|
| 1-butanol + NADP <sup>+</sup> => butanal + NADPH                                | 12.6 ± 4.8                                                   |
| O <sub>2(aq)</sub> + NADPH => H <sub>2</sub> O <sub>2</sub> + NADP <sup>+</sup> | - 121.8 ± 8.3                                                |
| H <sub>2</sub> O <sub>2</sub> => ½ O <sub>2(aq)</sub> + H <sub>2</sub> O        | - 96.5 ± 6.7                                                 |
| <b>Combination: oxidative step, orthogonal cascade</b>                          | <b>- 205.7 ± 19.8</b>                                        |

<sup>(a)</sup> calculated in aqueous buffer at pH 8.5 and ionic strength 1 M

**Table S7.** Thermodynamic calculation for the orthogonal, oxidation-reduction amination of primary alcohol: the reductive amination step

| Equation                                                                                   | $\Delta_r G'^{\circ}$ [KJ mol <sup>-1</sup> ] <sup>(a)</sup> |
|--------------------------------------------------------------------------------------------|--------------------------------------------------------------|
| butanal + NADH + NH <sub>3(aq)</sub> => 1-butylamine + NAD <sup>+</sup> + H <sub>2</sub> O | -20.5 ± 6.2                                                  |
| formate + NAD <sup>+</sup> => CO <sub>2(aq)</sub> + NADH                                   | - 15.1 ± 6.5                                                 |
| <b>Combination: reductive amination step, orthogonal cascade</b>                           | <b>- 35.6 ± 12.7</b>                                         |

<sup>(a)</sup> calculated in aqueous buffer at pH 8.5 and ionic strength 1 M

**Table S8.** Thermodynamic calculation for the orthogonal, oxidation-reduction amination of primary alcohol: the overall cascade

| Steps                                           | $\Delta_r G'^{\circ}$ [KJ mol <sup>-1</sup> ] <sup>(a)</sup> |
|-------------------------------------------------|--------------------------------------------------------------|
| Combination: oxidative step, orthogonal cascade | - 205.7 ± 19.8                                               |
| Combination: reductive step, orthogonal cascade | - 35.6 ± 12.7                                                |
| <b>Combination: overall orthogonal cascade</b>  | <b>- 241.3 ± 32.5</b>                                        |

<sup>(a)</sup> calculated in aqueous buffer at pH 8.5 and ionic strength 1 M

For the overall orthogonal cascade: **K'eq = 1.88 x 10<sup>42</sup>**

## 7. Determination of the stereoselectivity for TeS-ADH W110A and TeS-ADH I86A.

The determination of the stereoselective outcome for the reduction of selected prochiral ketones was carried out using *E. coli* lyophilized cells overexpressing the TeS-ADH variants. 2-propanol was used as sacrificial cosubstrate for recycling of NADPH.

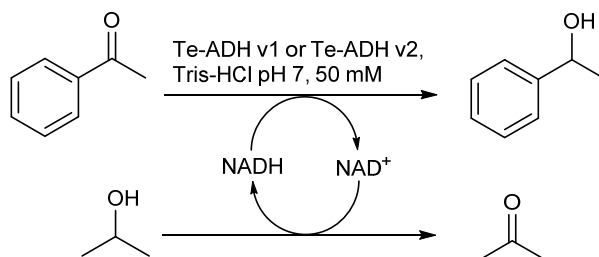

**Scheme S3.** Reduction of prochiral ketones with lyophilized cells of *E. coli* overexpressing TeS-ADH variants.

*E. coli*/TeS-ADH W110A or *E. coli*/TeS-ADH I86A (20 mg) were resuspended in Tris-HCl buffer (1 mL, pH 7, 50 mM) containing NADP<sup>+</sup> (1 mM). The suspension was incubated for 20 min, at 30 °C with orbital agitation (150 rpm). Then, the ketone substrate (50 mM) and isopropanol (50  $\mu$ l, equal to 5% v<sup>-1</sup>) were added. The reactions were run for 16 h at 30°C and orbital agitation (150 rpm). The reaction mixtures were extracted with EtOAc (2 x 500  $\mu$ L) and conversions were measured by GC-FID. The enantiomeric excess of the alcohol was analyzed by GC on a chiral phase after derivatization. Derivatization was performed by adding 4-(N,N-dimethylamino)pyridine (5 mg) dissolved in acetic anhydride (100  $\mu$ L). After washing with water and drying (MgSO<sub>4</sub>) the *ee* value of the derivatized compound was measured. For details on analytical methods and retention times, refer to section "Analytics".

**Table S9.** Reduction of selected prochiral ketones with TeS-ADH W110A

| Entry | Ketone        | Conversion [%] | <i>ee</i> [%]    |
|-------|---------------|----------------|------------------|
| 1     | <br><b>2a</b> | 69             | 73 ( <i>S</i> )  |
| 2     | <br><b>2b</b> | 97             | 92 ( <i>S</i> )  |
| 3     | <br><b>2c</b> | 84             | >99 ( <i>S</i> ) |
| 4     | <br><b>2d</b> | 40             | 82 ( <i>S</i> )  |
| 5     | <br><b>2e</b> | 94             | 93 ( <i>S</i> )  |
| 6     | <br><b>2g</b> | 21             | 99 ( <i>S</i> )  |
| 7     | <br><b>2m</b> | 88             | 39 ( <i>S</i> )  |
| 8     | <br><b>2n</b> | 89             | 5 ( <i>S</i> )   |
| 9     | <br><b>2p</b> | 76             | 95 ( <i>S</i> )  |
| 10    | <br><b>2u</b> | 14             | >99 ( <i>S</i> ) |
| 11    | <br><b>2v</b> | 96             | >99 ( <i>S</i> ) |
| 12    | <br><b>2w</b> | 4              | 19 ( <i>S</i> )  |
| 13    | <br><b>2x</b> | 97             | 87 ( <i>S</i> )  |

**Table S10.** Reduction of selected prochiral ketones with TeS-ADH I86A

| Entry | Ketone        | Conversion [%] | ee [%]           |
|-------|---------------|----------------|------------------|
| 1     | <br><b>2b</b> | 70             | 97 ( <i>R</i> )  |
| 2     | <br><b>2c</b> | 11             | 89 ( <i>S</i> )  |
| 3     | <br><b>2d</b> | 2              | 49 ( <i>S</i> )  |
| 4     | <br><b>2e</b> | 60             | 97 ( <i>S</i> )  |
| 5     | <br><b>2g</b> | 62             | >99 ( <i>S</i> ) |
| 6     | <br><b>2m</b> | 85             | 27 ( <i>S</i> )  |
| 7     | <br><b>2n</b> | 85             | 56 ( <i>R</i> )  |
| 8     | <br><b>2p</b> | 80             | 78 ( <i>R</i> )  |
| 9     | <br><b>2u</b> | 83             | >99 ( <i>S</i> ) |
| 10    | <br><b>2v</b> | 9              | >99 ( <i>S</i> ) |
| 11    | <br><b>2x</b> | 4              | >99 ( <i>S</i> ) |

## 8. Studies on the first oxidative cycle of the orthogonal biocatalytic network for the amination of alcohols

**Table S11.** Oxidation of (*S*)-phenyl 2-propanol ((*S*)-**1a**) to phenylacetone (**2a**). Reaction conditions: (*S*)-**1a** (20 mM), TeS-ADH W110A (13  $\mu$ M), His<sub>6</sub>-tagged YcnD (5  $\mu$ M), catalase (0.2  $\mu$ M) and NADP<sup>+</sup> (0.5 mM) in Tris-HCl buffer at varied pH (7 - 8.5), 30 °C, 24 h, orbital agitation 170 rpm.

| Entry | pH  | Conversion [%] |
|-------|-----|----------------|
| 1     | 7   | 82             |
| 2     | 7.5 | 91             |
| 3     | 8   | 86             |
| 4     | 8.5 | 85             |

**Table S12.** Oxidation of (*S*)-phenyl 2-propanol ((*S*)-**1a**) to phenylacetone (**2a**). Reaction conditions: (*S*)-**1a** (20 mM), varied concentration of TeS-ADH W110A (13 – 26  $\mu$ M), His<sub>6</sub>-tagged YcnD (5 – 10  $\mu$ M), catalase (0.2  $\mu$ M) and NADP<sup>+</sup> (0.5 mM) in Tris-HCl buffer at pH 8.5, 30 °C, 24 h or 48 h, orbital agitation 170 rpm.

| Entry | TeS-ADH W110A [ $\mu$ M] | YcnD [ $\mu$ M] | Reaction Time [h] | Conversion [%] |
|-------|--------------------------|-----------------|-------------------|----------------|
| 1     | 13                       | 5               | 24                | 73             |
| 2     | 13                       | 10              | 24                | 85             |
| 3     | 26                       | 5               | 24                | 93             |
| 4     | 26                       | 10              | 24                | 95             |
| 5     | 26                       | 10              | 48                | 98             |

## 9. Initial studies on the orthogonal biocatalytic network for the asymmetric amination of alcohols

**Table S13.** Initial studies on the orthogonal biocatalytic network for the amination of (*S*)-**1b** (20 mM). Different variants possessing His<sub>6</sub>-tags and devoid of His<sub>6</sub>-tags (YcnD and Ch1-AmDH) were applied at varied concentrations. The other enzymes were Strep-tagged TeS-ADH W110A (varied concentration), Cb-FDH (20  $\mu$ M), catalase (0.2  $\mu$ M), NAD<sup>+</sup> (0.5 mM) and NADP<sup>+</sup> (0.5 mM). The reaction was carried out in HCOONH<sub>4</sub> buffer (1 M, pH 8.5) at 30 °C with orbital agitation (170 rpm).

| Entry | Type of TeS-ADH W110A   | Type of YcnD                        | Type of Ch1-AmDH                     | Time [h] | Conversion [%] (*) |        |         |
|-------|-------------------------|-------------------------------------|--------------------------------------|----------|--------------------|--------|---------|
|       |                         |                                     |                                      |          | Amine              | Ketone | Alcohol |
| 1     | Strep-tag<br>26 $\mu$ M | His <sub>6</sub> -tag<br>5 $\mu$ M  | His <sub>6</sub> -tag<br>126 $\mu$ M | 48       | 64                 | 1      | 35      |
| 2     | Strep-tag<br>26 $\mu$ M | His <sub>6</sub> -tag<br>10 $\mu$ M | His <sub>6</sub> -tag<br>126 $\mu$ M | 48       | 51                 | <1     | 49      |
| 3     | Strep-tag<br>52 $\mu$ M | His <sub>6</sub> -tag<br>5 $\mu$ M  | His <sub>6</sub> -tag<br>126 $\mu$ M | 48       | 78                 | 1      | 21      |
| 4     | Strep-tag<br>52 $\mu$ M | His <sub>6</sub> -tag<br>10 $\mu$ M | His <sub>6</sub> -tag<br>126 $\mu$ M | 48       | 73                 | 1      | 26      |
| 5     | Strep-tag<br>26 $\mu$ M | His <sub>6</sub> -tag<br>5 $\mu$ M  | No tag<br>100 $\mu$ M                | 48       | 78                 | 1      | 21      |

(\*) Every data is the average of three independent experiments showing deviation of  $\pm 1 - 2\%$

## 10. Time study for the amination of (S)-1b with inversion of configuration

**Table S14.** Time study for the amination of (S)-1b (20 mM) with inversion of configuration. Figure 2 in main paper.

| time [h] | Amine [%] | Ketone [%] | Alcohol [%] |
|----------|-----------|------------|-------------|
| 0.5      | 14.09     | 63.36      | 22.55       |
| 1        | 45.33     | 41.99      | 12.68       |
| 2        | 74.44     | 23.97      | 1.58        |
| 3        | 89.02     | 9.16       | 1.82        |
| 6        | 97.77     | 0.79       | 1.44        |
| 10       | 98.78     | 0.12       | 1.09        |
| 12       | 98.73     | 0.24       | 1.04        |
| 16       | 99.03     | 0.18       | 0.79        |
| 24       | 99.14     | 0.11       | 0.74        |

## 11. Determination of the stereoselectivity for TeS-ADH I86A W110A

**Table S15.** Reduction of selected prochiral ketones with TeS-ADH I86A W110A.

| Entry | Ketone                                                                                           | Conversion [%] | ee [%] |
|-------|--------------------------------------------------------------------------------------------------|----------------|--------|
| 1     | 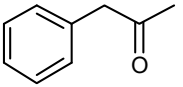<br><b>2a</b> | 30             | 8 (R)  |
| 1     | <br><b>2b</b> | 66             | 15 (S) |
| 2     | <br><b>2c</b> | 17             | 89 (S) |
| 3     | <br><b>2d</b> | 59             | 20 (S) |
| 4     | <br><b>2e</b> | 75             | 72 (S) |
| 5     | <br><b>2g</b> | 27             | 96 (S) |
| 6     | <br><b>2m</b> | 88             | 24 (S) |
| 7     | <br><b>2n</b> | 89             | 0      |

|    |                                                                                                    |    |         |
|----|----------------------------------------------------------------------------------------------------|----|---------|
| 8  | 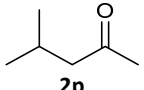 <p><b>2p</b></p> | 83 | 10 (S)  |
| 9  |  <p><b>2u</b></p> | 22 | >99 (S) |
| 10 |  <p><b>2v</b></p> | 52 | >99 (S) |
| 11 |  <p><b>2x</b></p> | 90 | 63 (S)  |

## 12. Sequence alignment between TeS-ADH and Tb-ADH

Sequence alignment between the ADH from *Thermoanaerobacter ethanolicus* (TeS-ADH) and the ADH from *Thermoanaerobacter brockii* (Tb-ADH)

```
*****
TeS-ADH ( 1) MKGFAMLSIGKVGWIEKEKPAPGPFDAIVRPLAVAPCTSDIHTVFEGAIGERHNMILGHE
Tb-ADH ( 1) MKGFAMLSIGKVGWIEKEKPAPGPFDAIVRPLAVAPCTSDIHTVFEGAIGERHNMILGHE

*****
TeS-ADH ( 61) AVGEVVEVGSEVKDFKPGDRVVVPAITPDWWTSEVQRGYHQHSGGMLAGWKFSNVKDGVF
Tb-ADH ( 61) AVGEVVEVGSEVKDFKPGDRVVVPAITPDWRTSEVQRGYHQHSGGMLAGWKFSNVKDGVF

*****
TeS-ADH ( 121) GEFFHVNDADMNLAHLPKEIPLAAVMI PDMMTTGFHGAELADIELGATVAVLGIGPVGL
Tb-ADH ( 121) GEFFHVNDADMNLAHLPKEIPLAAVMI PDMMTTGFHGAELADIELGATVAVLGIGPVGL

*****
TeS-ADH ( 181) MAVAGAKLRGAGRI IAVGSRPVCVDAAKYYGATDIVNYKDGPIESQIMNLTGKGVDAAI
Tb-ADH ( 181) MAVAGAKLRGAGRI IAVGSRPVCVDAAKYYGATDIVNYKDGPIESQIMNLTGKGVDAAI

*****
TeS-ADH ( 241) IAGGNADIMATAVKIVKPGGTIANVNYFGEGEVLPVPRLEWGCGMAHKTIKGGLCPGGRL
Tb-ADH ( 241) IAGGNADIMATAVKIVKPGGTIANVNYFGEGEVLPVPRLEWGCGMAHKTIKGGLCPGGRL

*****
TeS-ADH ( 301) RMERLIDL VFYKRPVDP SKLVTHVFRGFDNIEKAFMLMKDKPKDLIKPVVILA
Tb-ADH ( 301) RMERLIDL VFYKRVPDPSKLVTHVFRGFDNIEKAFMLMKDKPKDLIKPVVILA
```



13. <sup>1</sup>H-NMR for the scale-up of the amination of substrate *rac*-1m to give enantiopure (*R*)-1m

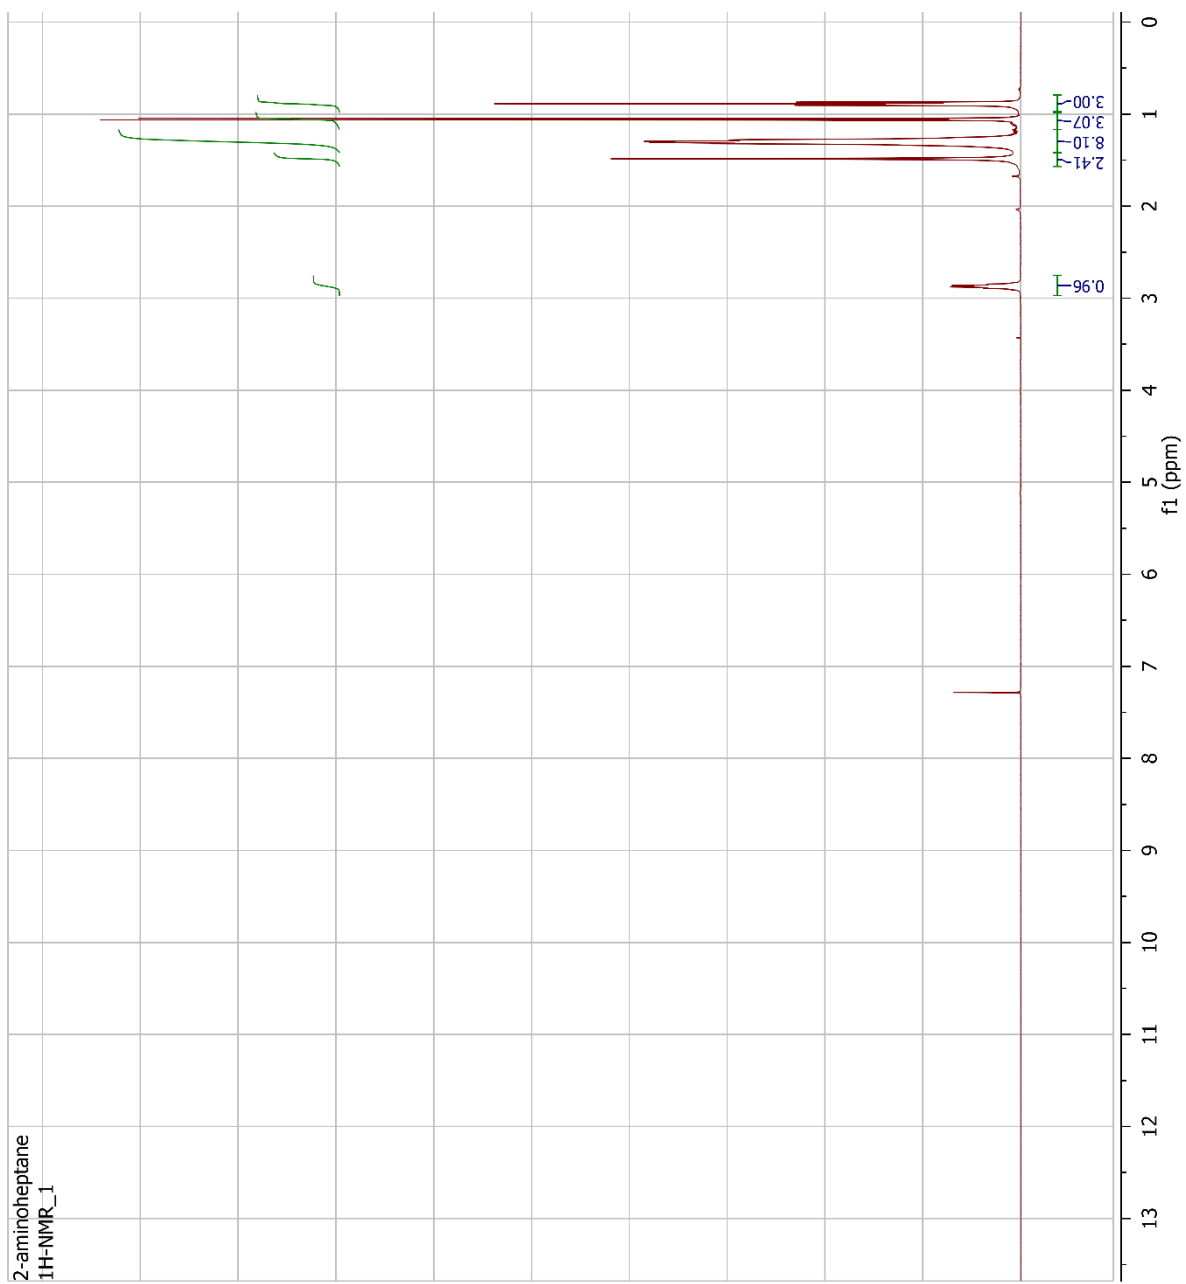

## 14. Analytics

### 14.1 Methods for the determination of the conversion

(A) Column: Agilent J&W DB-1701 (60 m, 250  $\mu\text{m}$ , 0.25  $\mu\text{m}$ ). Carrier gas:  $\text{H}_2$

GC program parameters: injector 250  $^\circ\text{C}$ ; constant pressure 13.5 psi; temperature program: 80  $^\circ\text{C}$ /hold 6.5 min; 160  $^\circ\text{C}$ /rate 5  $^\circ\text{C min}^{-1}$ /hold 2 min; 280  $^\circ\text{C}$ /rate 20  $^\circ\text{C min}^{-1}$ /hold 1 min.

**Table S16.** Retention times using method A.

| Alcohols  | Time [min] | Ketones/Aldehyde | Time [min] | Amines    | Time [min] |
|-----------|------------|------------------|------------|-----------|------------|
| <b>1a</b> | 20.8       | <b>2a</b>        | 21.0       | <b>3a</b> | 19.2       |
| <b>1b</b> | 21.9       | <b>2b</b>        | 21.8       | <b>3b</b> | 20.0       |
| <b>1c</b> | 24.0       | <b>2c</b>        | 25.1       | <b>3c</b> | 23.2       |
| <b>1d</b> | 28.9(*)    | <b>2d</b>        | 28.9(*)    | <b>3d</b> | 28.1       |
| <b>1e</b> | 23.9       | <b>2e</b>        | 24.0       | <b>3e</b> | 22.6       |
| <b>1f</b> | 26.0       | <b>2f</b>        | 25.6       | <b>3f</b> | 24.1       |
| <b>1j</b> | 21.8       | <b>2j</b>        | 22.0       | <b>3j</b> | 19.7       |

(\*) Ketone **2d** can be separated from the other components and evaluated using: column Agilent J&W HP-5 (30 m, 320  $\mu\text{m}$ , 0.25  $\mu\text{m}$ ). Carrier gas:  $\text{H}_2$ . GC program parameters: injector 250  $^\circ\text{C}$ ; constant flow 1.8  $\text{mL min}^{-1}$ ; temperature program: 100  $^\circ\text{C}$ /hold 5 min; 300  $^\circ\text{C}$ /rate 10  $^\circ\text{C min}^{-1}$ /hold 0 min.

(B) Column: Agilent J&W DB-1701 (30 m, 250  $\mu\text{m}$ , 0.25  $\mu\text{m}$ ). Carrier gas:  $\text{H}_2$

GC program parameters: injector 250  $^\circ\text{C}$ ; constant pressure 6.9 psi; temperature program: 80  $^\circ\text{C}$ /hold 6.5 min; 160  $^\circ\text{C}$ /rate 10  $^\circ\text{C min}^{-1}$ /hold 5 min; 200  $^\circ\text{C}$ /rate 20  $^\circ\text{C min}^{-1}$ /hold 2 min; 280  $^\circ\text{C}$ /rate 20  $^\circ\text{C min}^{-1}$ /hold 1 min.

**Table S17.** Retention times using method B.

| Alcohols  | Time [min] | Ketones/Aldehyde | Time [min] | Amines    | Time [min] |
|-----------|------------|------------------|------------|-----------|------------|
| <b>1g</b> | 14.7       | <b>2g</b>        | 14.0       | <b>3g</b> | 14.3       |
| <b>1h</b> | 11.8       | <b>2h</b>        | 10.3       | <b>3h</b> | 10.0       |
| <b>1i</b> | 11.6       | <b>2i</b>        | 10.6       | <b>3i</b> | 9.8        |
| <b>1k</b> | 12.9       | <b>2k</b>        | 13.0       | <b>3k</b> | 11.6       |
| <b>1l</b> | 8.0        | <b>2l</b>        | 7.7        | <b>3l</b> | 6.0        |
| <b>1m</b> | 5.0        | <b>2m</b>        | 4.8        | <b>3m</b> | 3.9        |
| <b>1q</b> | 10.1       | <b>2q</b>        | 7.9        | <b>3q</b> | 8.2        |
| <b>1r</b> | 7.5        | <b>2r</b>        | 4.9        | <b>3r</b> | 5.1        |

(C) Column: Agilent J&W DB-1701 (30 m, 250  $\mu\text{m}$ , 0.25  $\mu\text{m}$ ). Carrier gas:  $\text{H}_2$

GC program parameters: injector 250  $^\circ\text{C}$ ; constant pressure 6.9 psi; temperature program: 60  $^\circ\text{C}$ /hold 6.5 min; 100  $^\circ\text{C}$ /rate 20  $^\circ\text{C min}^{-1}$ /hold 1 min; 280  $^\circ\text{C}$ /rate 20  $^\circ\text{C min}^{-1}$ /hold 1 min.

**Table S18.** Retention times using method C.

| Alcohols  | Time [min] | Ketones/Aldehyde | Time [min] | Amines    | Time [min] |
|-----------|------------|------------------|------------|-----------|------------|
| <b>1n</b> | 5.1        | <b>2n</b>        | 4.7        | <b>3n</b> | 3.7        |
| <b>1o</b> | 3.2        | <b>2o</b>        | 3.0        | <b>3o</b> | 2.6        |
| <b>1p</b> | 4.1        | <b>2p</b>        | 3.6        | <b>3p</b> | 3.1        |
| <b>1s</b> | 7.6        | <b>2s</b>        | 4.8        | <b>3s</b> | 5.0        |
| <b>1t</b> | 4.5        | <b>2t</b>        | 3.0        | <b>3t</b> | 3.2        |

#### 14.2 Methods for the determination of the enantiomeric excess

(D) Column: Varian Chrompack Chiracel Dex-CB column (25 m, 320  $\mu\text{m}$ , 0.25  $\mu\text{m}$ ). Carrier gas:  $\text{H}_2$

GC program parameters: injector 200 $^\circ\text{C}$ ; constant flow 1.3  $\text{mL min}^{-1}$ ; temperature program: 100  $^\circ\text{C}$ /hold 2 min; 130  $^\circ\text{C}$ /rate 1  $^\circ\text{C min}^{-1}$ /hold 5 min; 170  $^\circ\text{C}$ /rate 10  $^\circ\text{C min}^{-1}$ /hold 10 min; 180  $^\circ\text{C}$ /rate 10  $^\circ\text{C min}^{-1}$ /hold 1 min.

**Table S19.** Retention times using method D.

| (S)-amine      | Time [min] | (R)-amine      | Time [min] |
|----------------|------------|----------------|------------|
| (S)- <b>3a</b> | 39.7       | (R)- <b>3a</b> | 40.0       |
| (S)- <b>3b</b> | 40.2       | (R)- <b>3b</b> | 40.4       |
| (S)- <b>3e</b> | 40.8       | (R)- <b>3e</b> | 41.0       |
| (S)- <b>3f</b> | 43.2       | (R)- <b>3f</b> | 43.5       |
| (S)- <b>3g</b> | 42.9       | (R)- <b>3g</b> | 43.5       |
| (S)- <b>3h</b> | 34.9       | (R)- <b>3h</b> | 37.1       |
| (S)- <b>3i</b> | 36.7       | (R)- <b>3i</b> | 38.2       |
| (S)- <b>3j</b> | 39.1       | (R)- <b>3j</b> | 39.8       |
| (S)- <b>3k</b> | 39.5       | (R)- <b>3k</b> | 40.0       |

(E) Column: Varian Chrompack Chiracel Dex-CB column (25 m, 320  $\mu\text{m}$ , 0.25  $\mu\text{m}$ ). Carrier gas:  $\text{H}_2$

GC program parameters: injector 200 $^\circ\text{C}$ ; constant flow 1.4  $\text{mL}$ ; temperature program: 100  $^\circ\text{C}$ /hold 2 min; 118  $^\circ\text{C}$ /rate 1  $^\circ\text{C min}^{-1}$ /hold 5 min; 170  $^\circ\text{C}$ /rate 10  $^\circ\text{C min}^{-1}$ /hold 10 min; 180  $^\circ\text{C}$ /rate 10  $^\circ\text{C min}^{-1}$ /hold 1 min.

**Table S20.** Retention times using method E.

| (S)-amine      | Time [min] | (R)-amine      | Time [min] |
|----------------|------------|----------------|------------|
| (S)- <b>3c</b> | 32.2       | (R)- <b>3c</b> | 32.4       |
| (S)- <b>3d</b> | 36.1       | (R)- <b>3d</b> | 36.4       |
| (S)- <b>3l</b> | 23.1       | (R)- <b>3l</b> | 24.7       |
| (S)- <b>3m</b> | 16.2       | (R)- <b>3m</b> | 17.3       |

(F) Column: Varian Chrompack Chiracel Dex-CB column (25 m, 320  $\mu\text{m}$ , 0.25  $\mu\text{m}$ ). Carrier gas:  $\text{H}_2$   
 GC program parameters: injector 200°C; constant flow 1.5 mL; temperature program: 60 °C/hold 2 min;  
 100 °C/rate 5 °C  $\text{min}^{-1}$ /hold 2 min; 180 °C/rate 10 °C  $\text{min}^{-1}$ /hold 1 min.

**Table S21.** Retention times using method F.

| (S)-amine      | Time [min] | (R)-amine      | Time [min] |
|----------------|------------|----------------|------------|
| (S)- <b>3n</b> | 15.2       | (R)- <b>3n</b> | 15.5       |
| (S)- <b>3o</b> | 13.3       | (R)- <b>3o</b> | 13.8       |
| (S)- <b>3p</b> | 14.2       | (R)- <b>3p</b> | 14.5       |

## 15. GC chromatograms

### 15.1 *Representative GC chromatograms for the determination of the conversions*

#### (1) Conversion of alcohol **1a** into amine **3a**

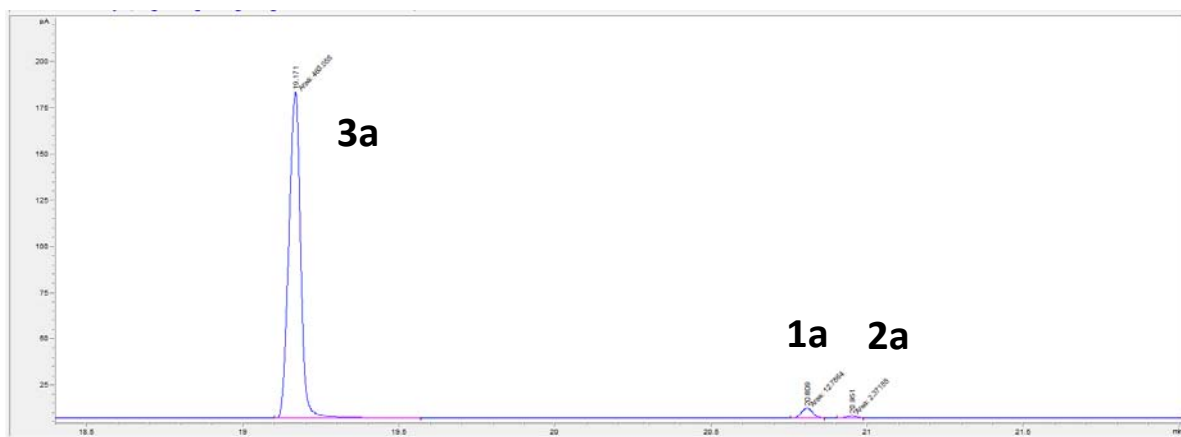

#### (2) Conversion of alcohol **1b** into amine **3b**

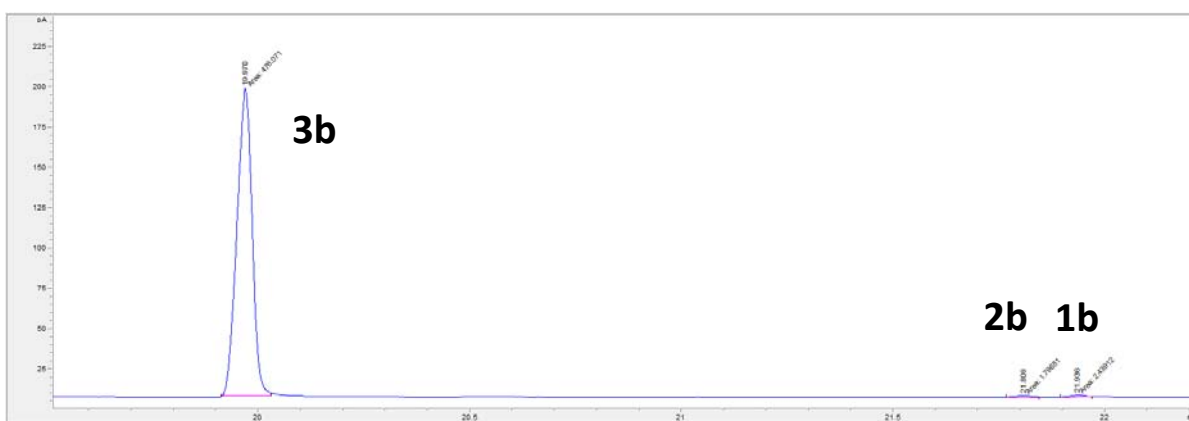

(3) Conversion of alcohol **1c** into amine **1c**: (a) Reference compound: alcohol **1c**; (b) Reference compound: ketone **2c**; (c) reaction

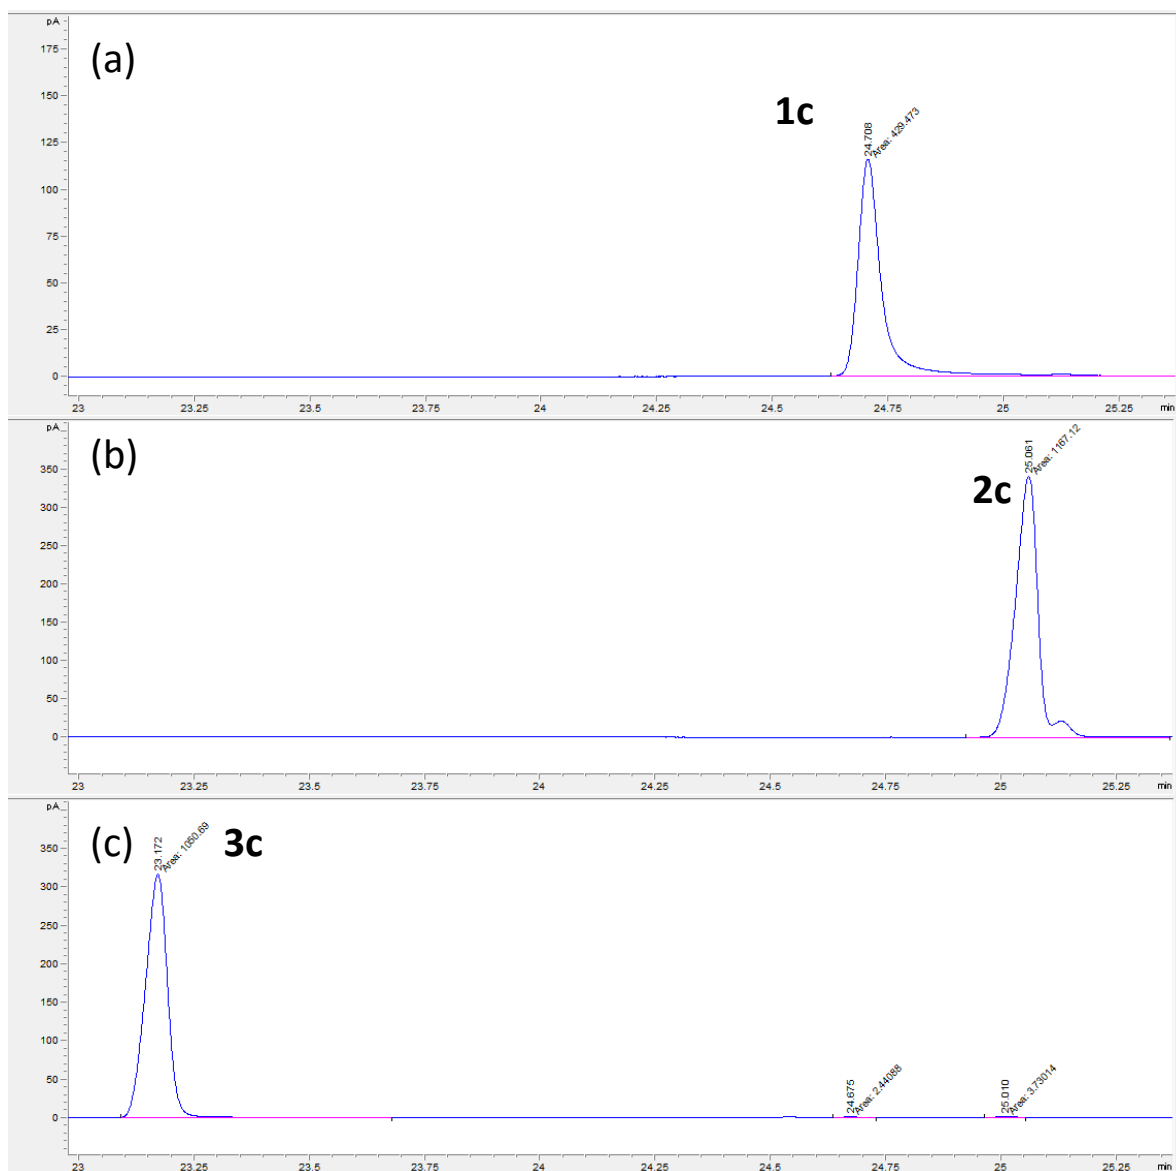

(4) Conversion of alcohol **1d** into amine **3d**: (a) Reference compound: alcohol **1d**; (b) Reference compound: ketone **2d**; (c) reaction

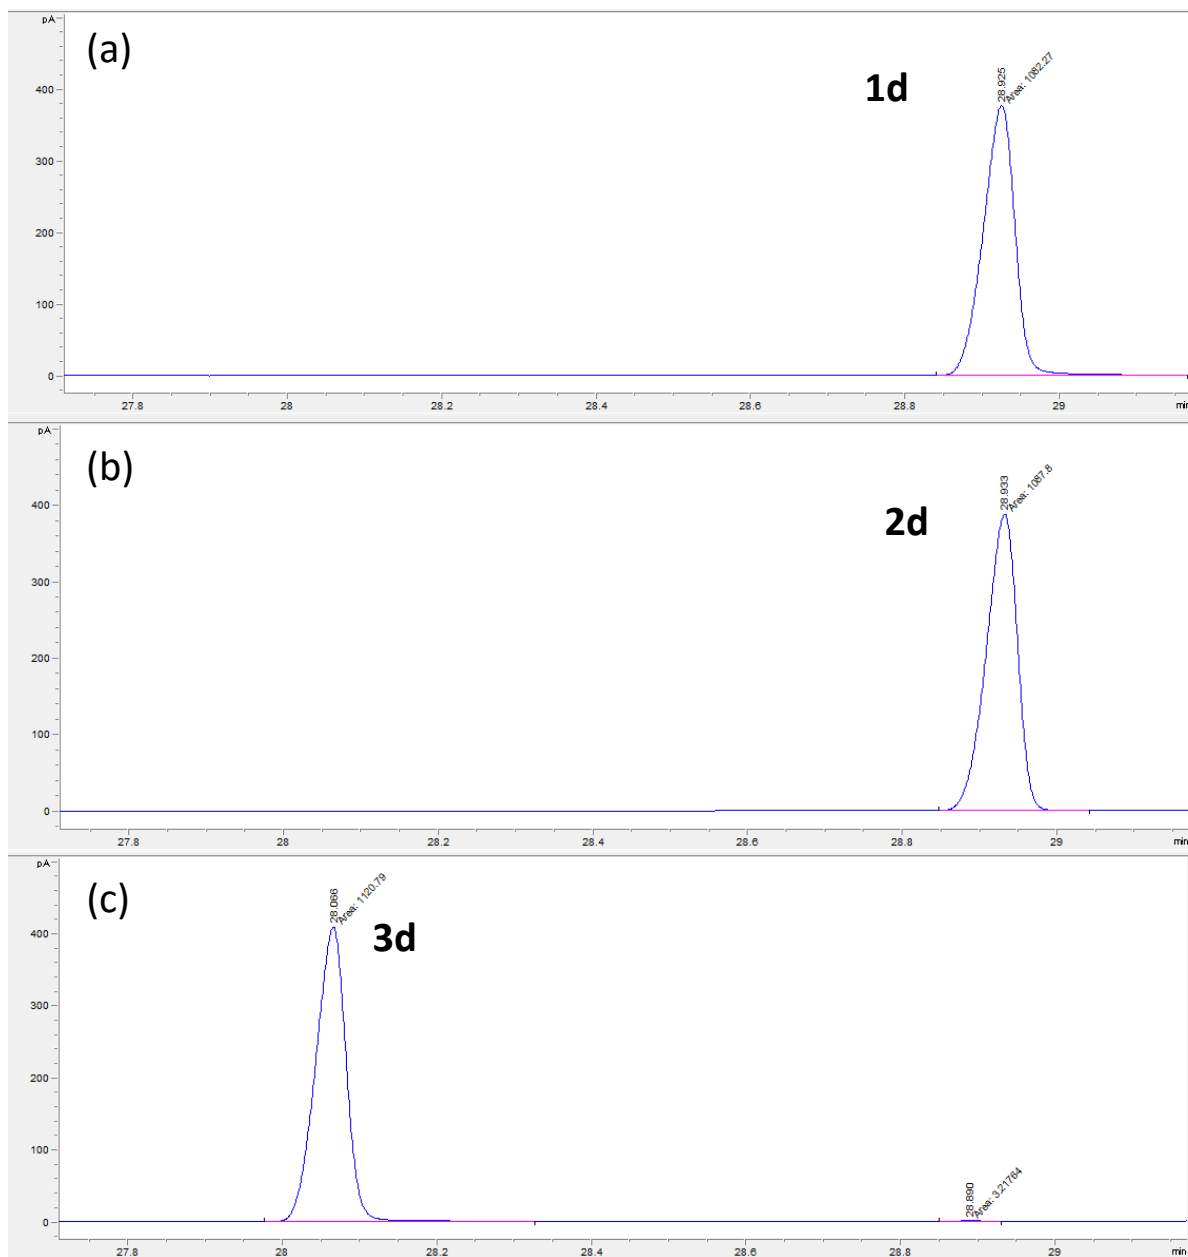

(5) Conversion of alcohol **1e** into amine **3e**

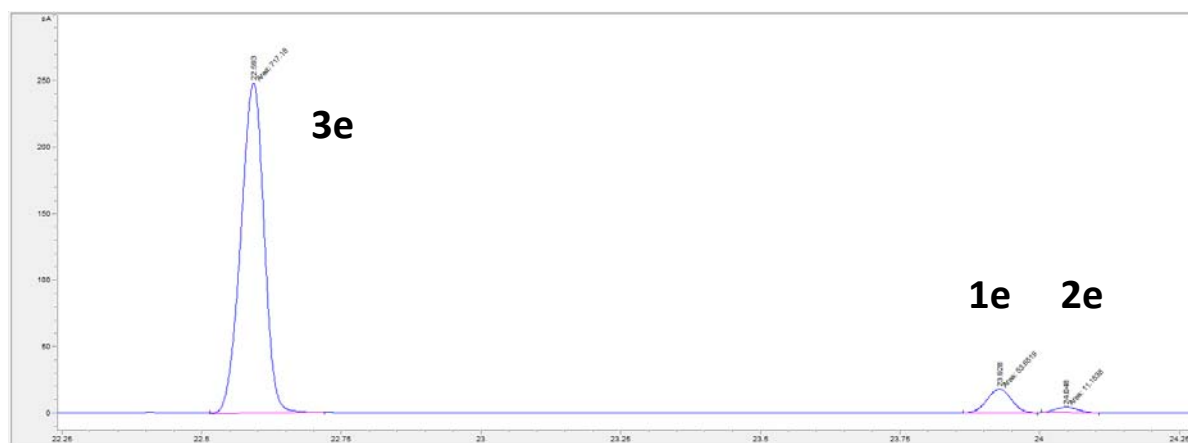

(6) Conversion of alcohol **1f** into amine **3f**: (a) Reference compound: alcohol **1f**; (b) Reference compound: ketone **2f**; (c) reaction

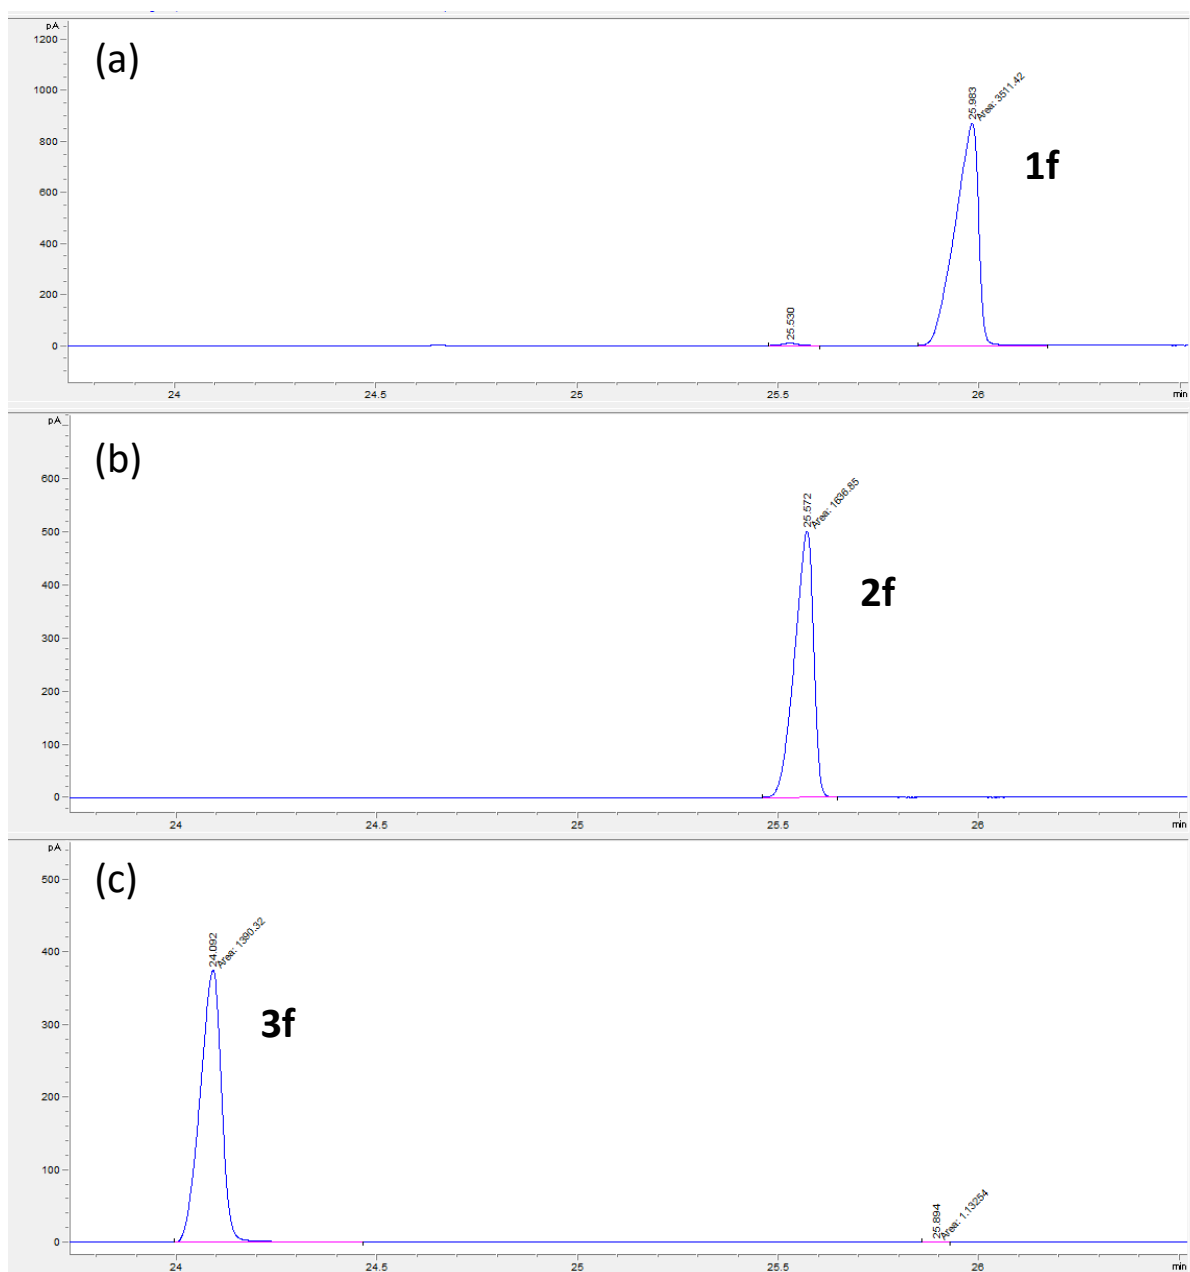

(7) Conversion of alcohol **1g** into amine **3g**

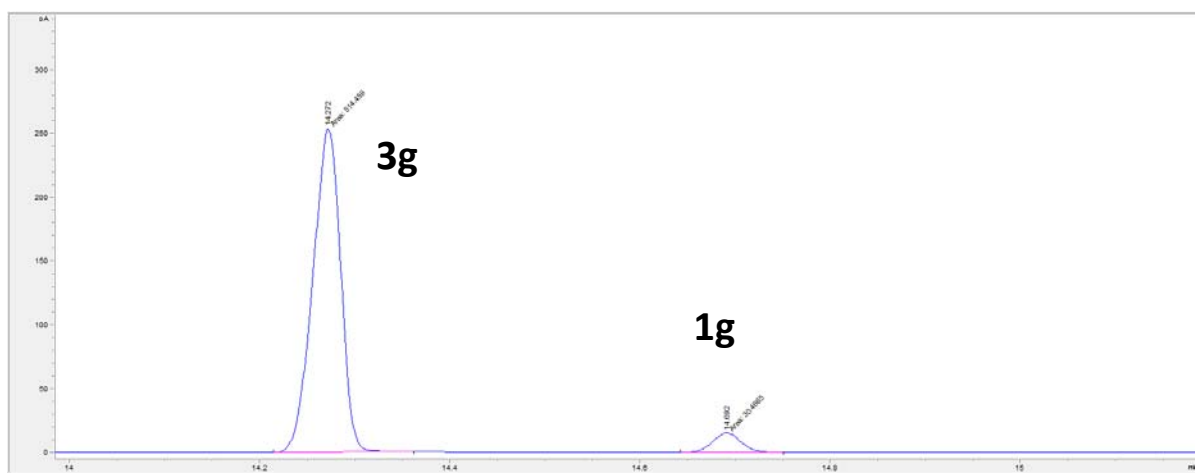

(8) Conversion of alcohol **1h** into amine **3h**

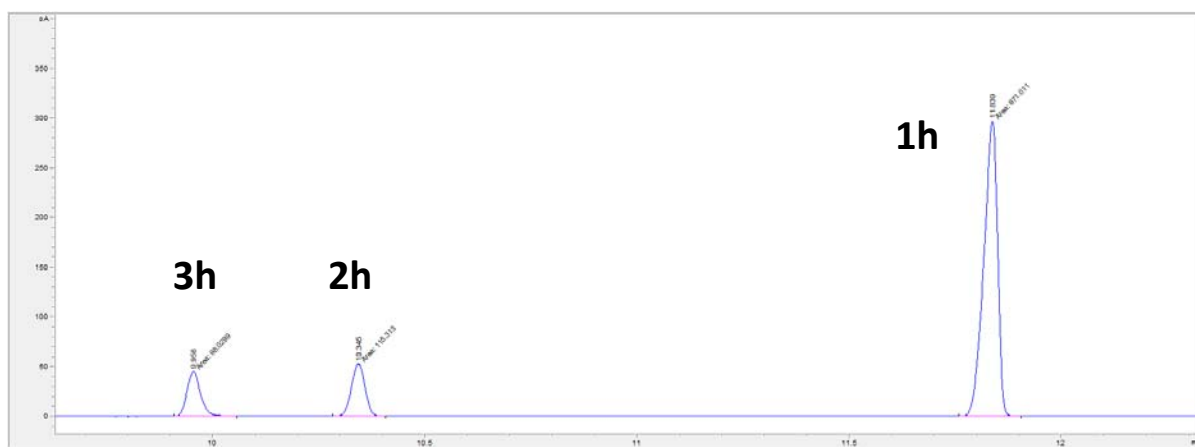

(9) Conversion of alcohol **1i** into amine **3i**

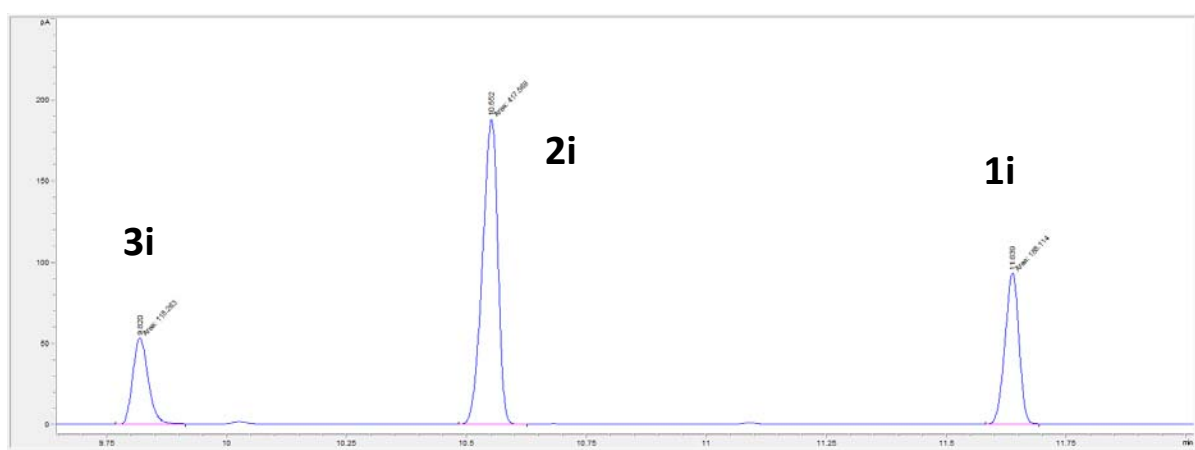



(10) Conversion of alcohol **1j** into amine **3j**

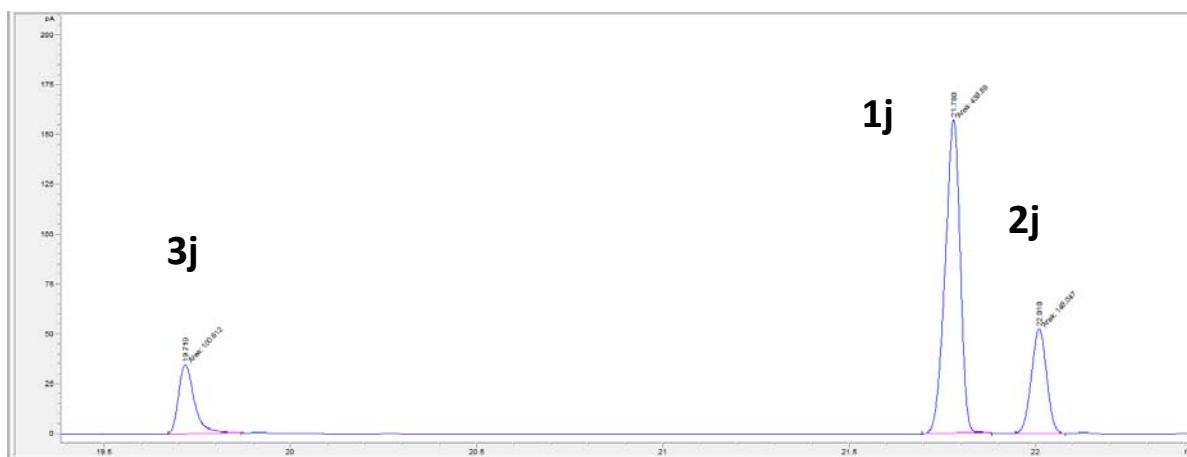

(11) Conversion of alcohol **1k** into amine **3k**

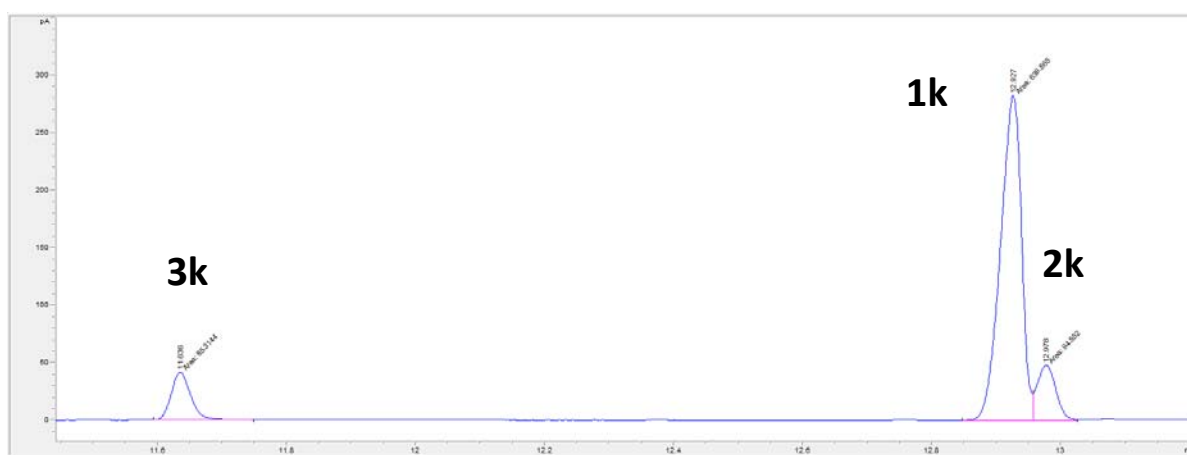

(12) Conversion of alcohol **1l** into amine **3l**

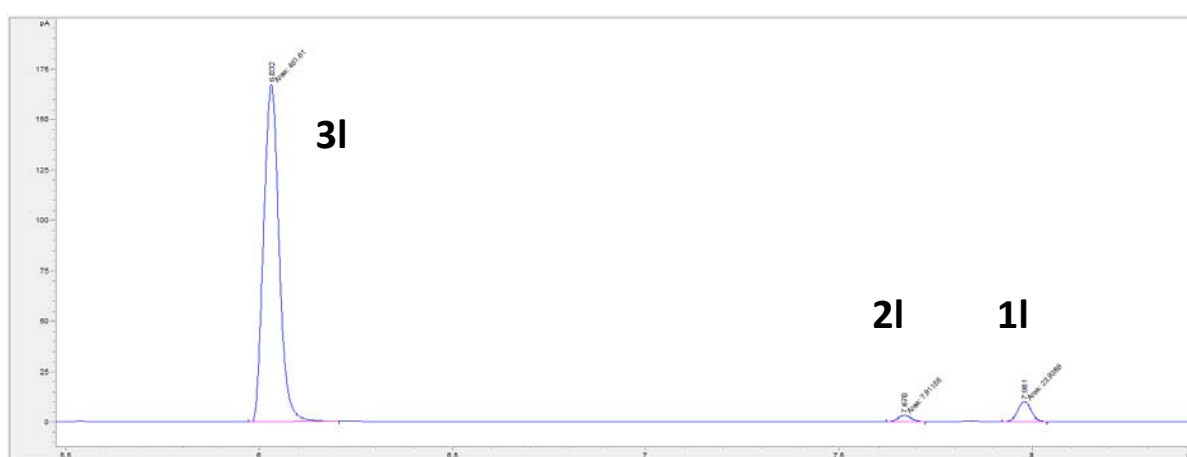

(13) Conversion of alcohol **1m** into amine **3m**

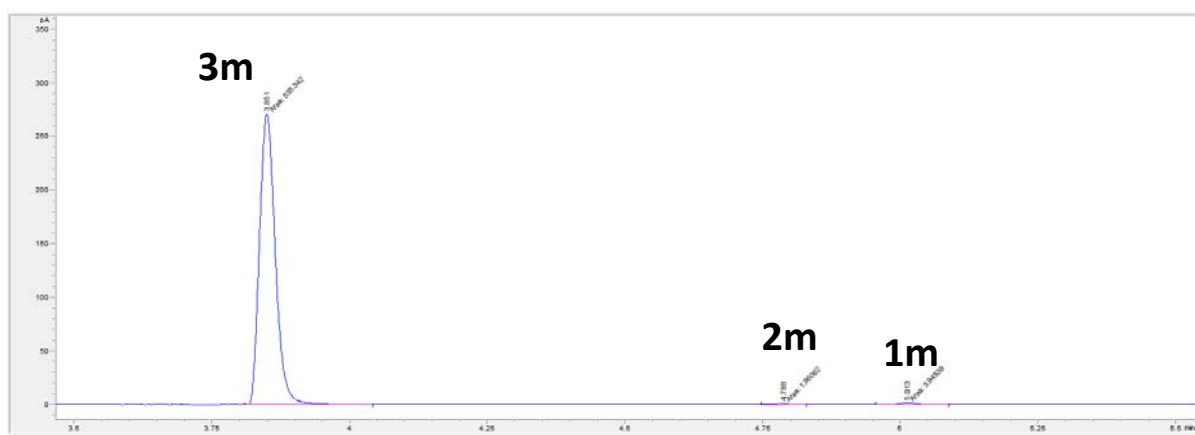

(14) Conversion of alcohol **1n** into amine **3n**. (a) Reference compound: alcohol **1n**; (b) Reference compound: ketone **2n**; (c) reaction

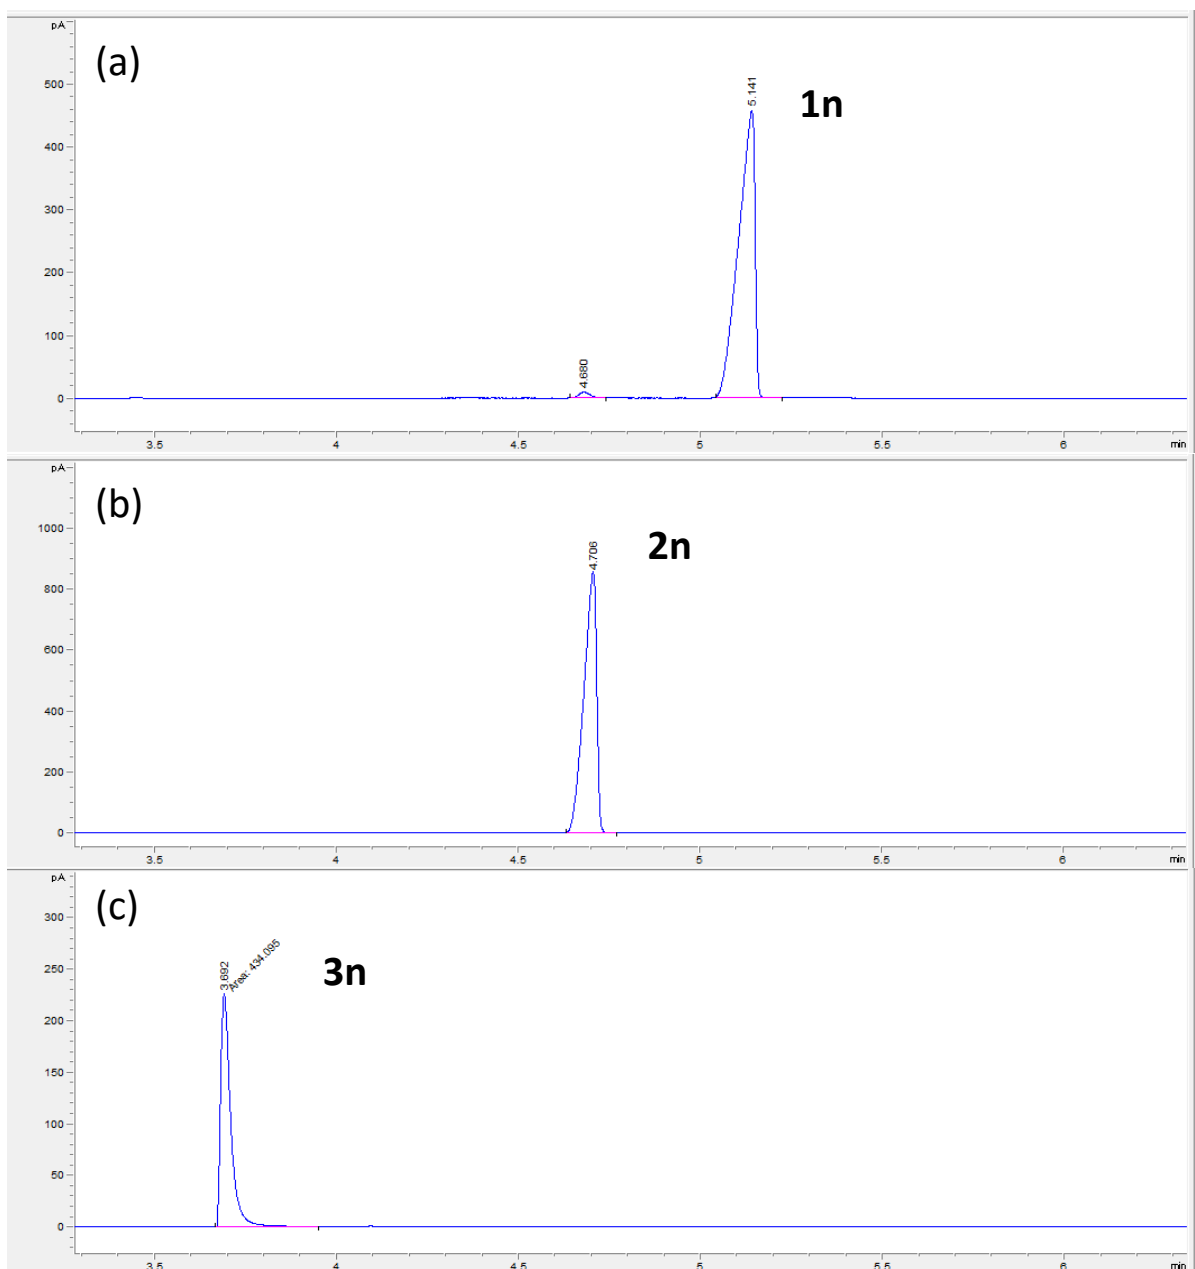

(15) Conversion of alcohol **1o** into amine **3o**

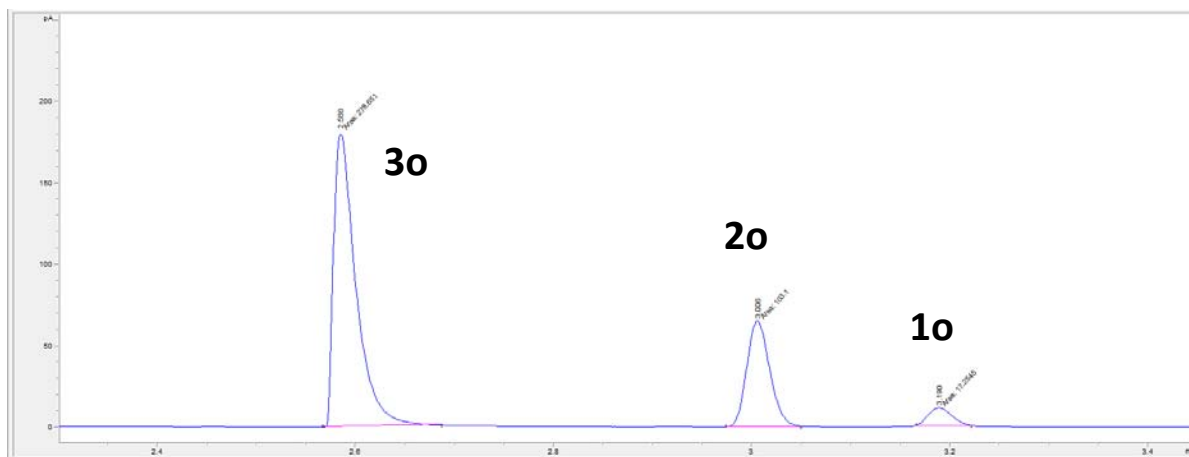

(16) Conversion of alcohol **1p** into amine **3p**

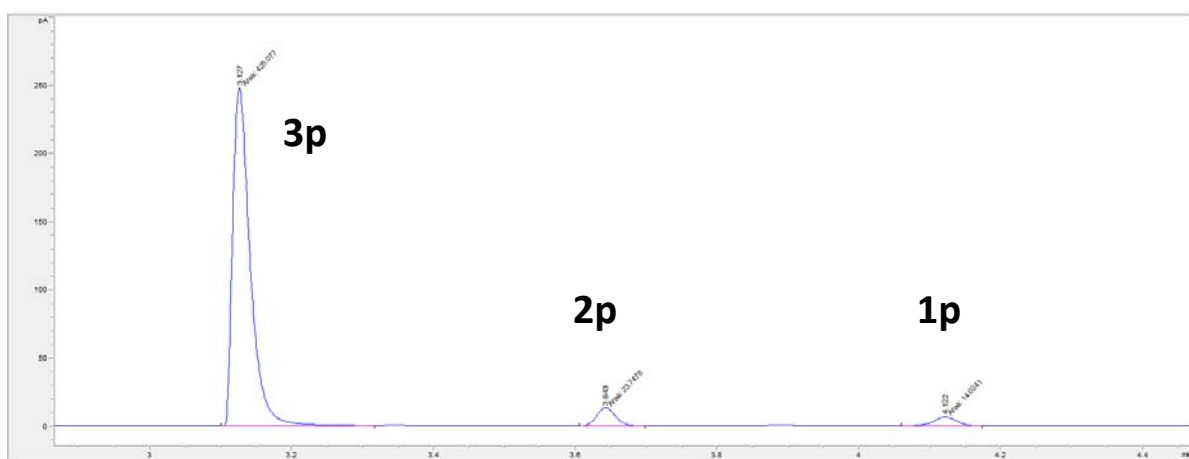

(17) Conversion of alcohol **1q** into amine **3q**

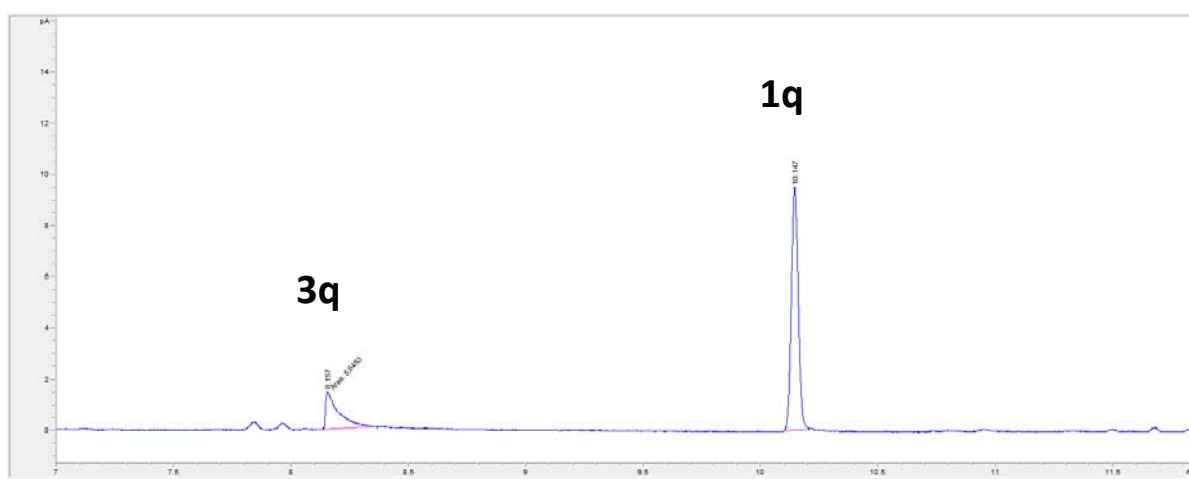

(18) Conversion of alcohol **1r** into amine **3r**

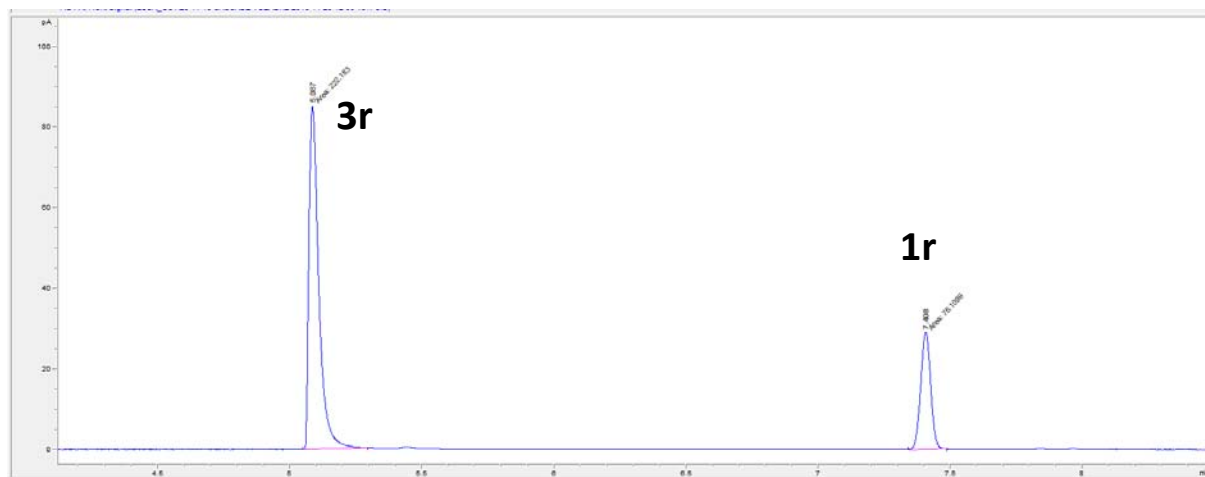

(19) Conversion of alcohol **1s** into amine **3s**

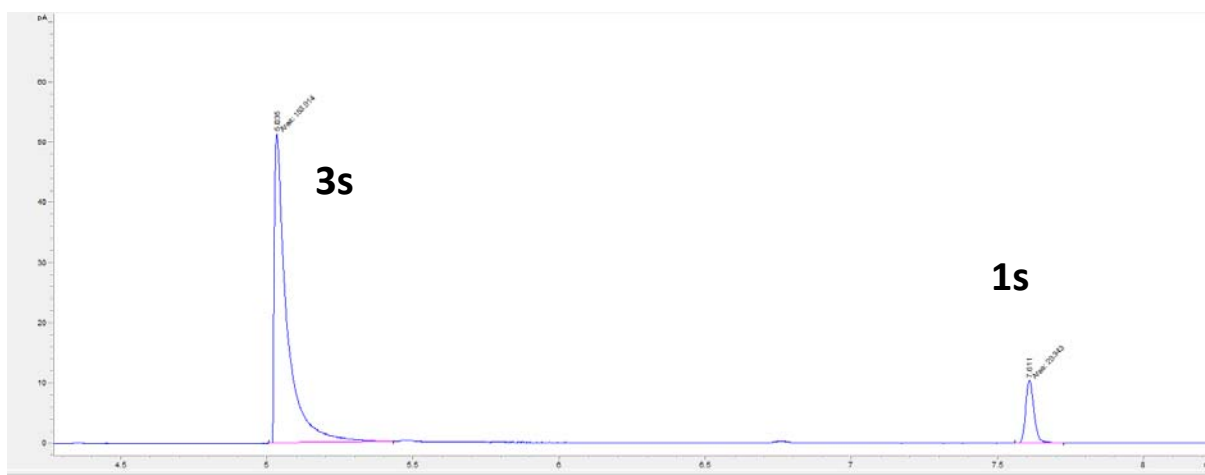

(20) Conversion of alcohol **1t** into amine **3t**

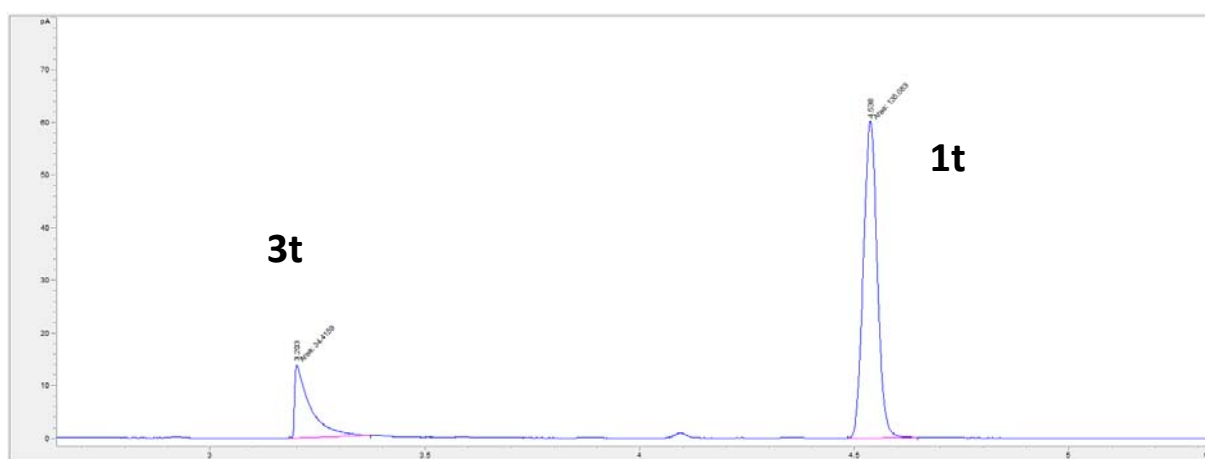

15.2 GC chromatograms for the upscaling of 1m.

(a) Composition after the biocatalytic reaction

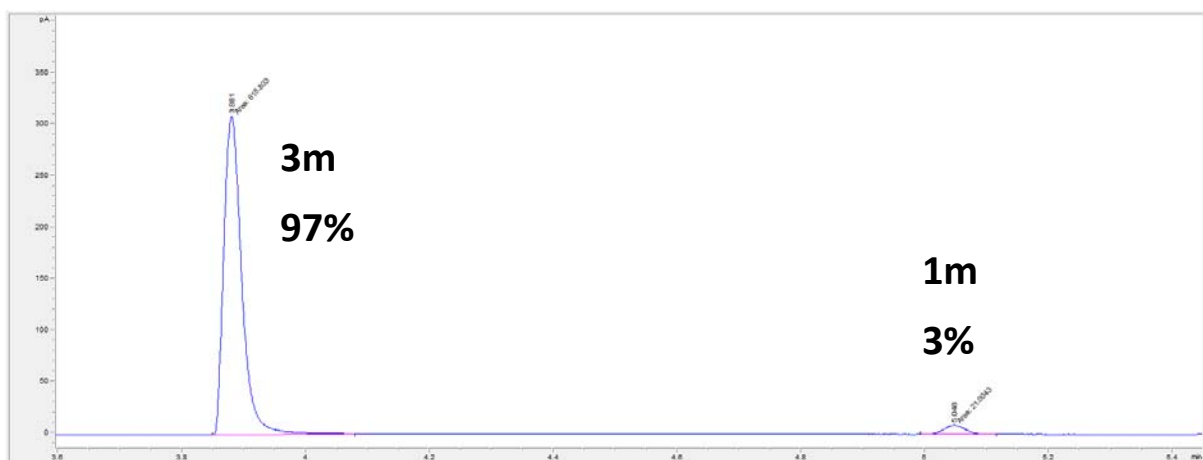

(b) Final product (after two step extraction under acid and basic conditions)

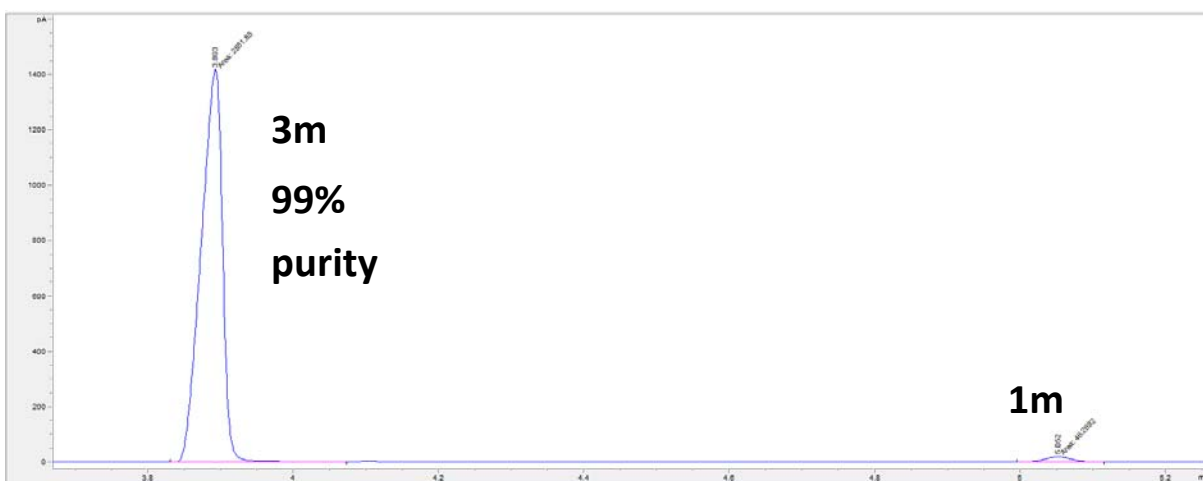

### 15.3 GC chromatograms for the determination of the ee values

(1) (a) Reference compound: amine (*S*)-**3a** from reaction catalyzed by stereoselective  $\omega$ -transaminase. (b) Reference compound: amine (*R*)-**3a** from reaction catalyzed by stereoselective  $\omega$ -transaminase. (c) Determination of the enantiomeric excess for the orthogonal-cascade to give (*R*)-**3a** as the final product.

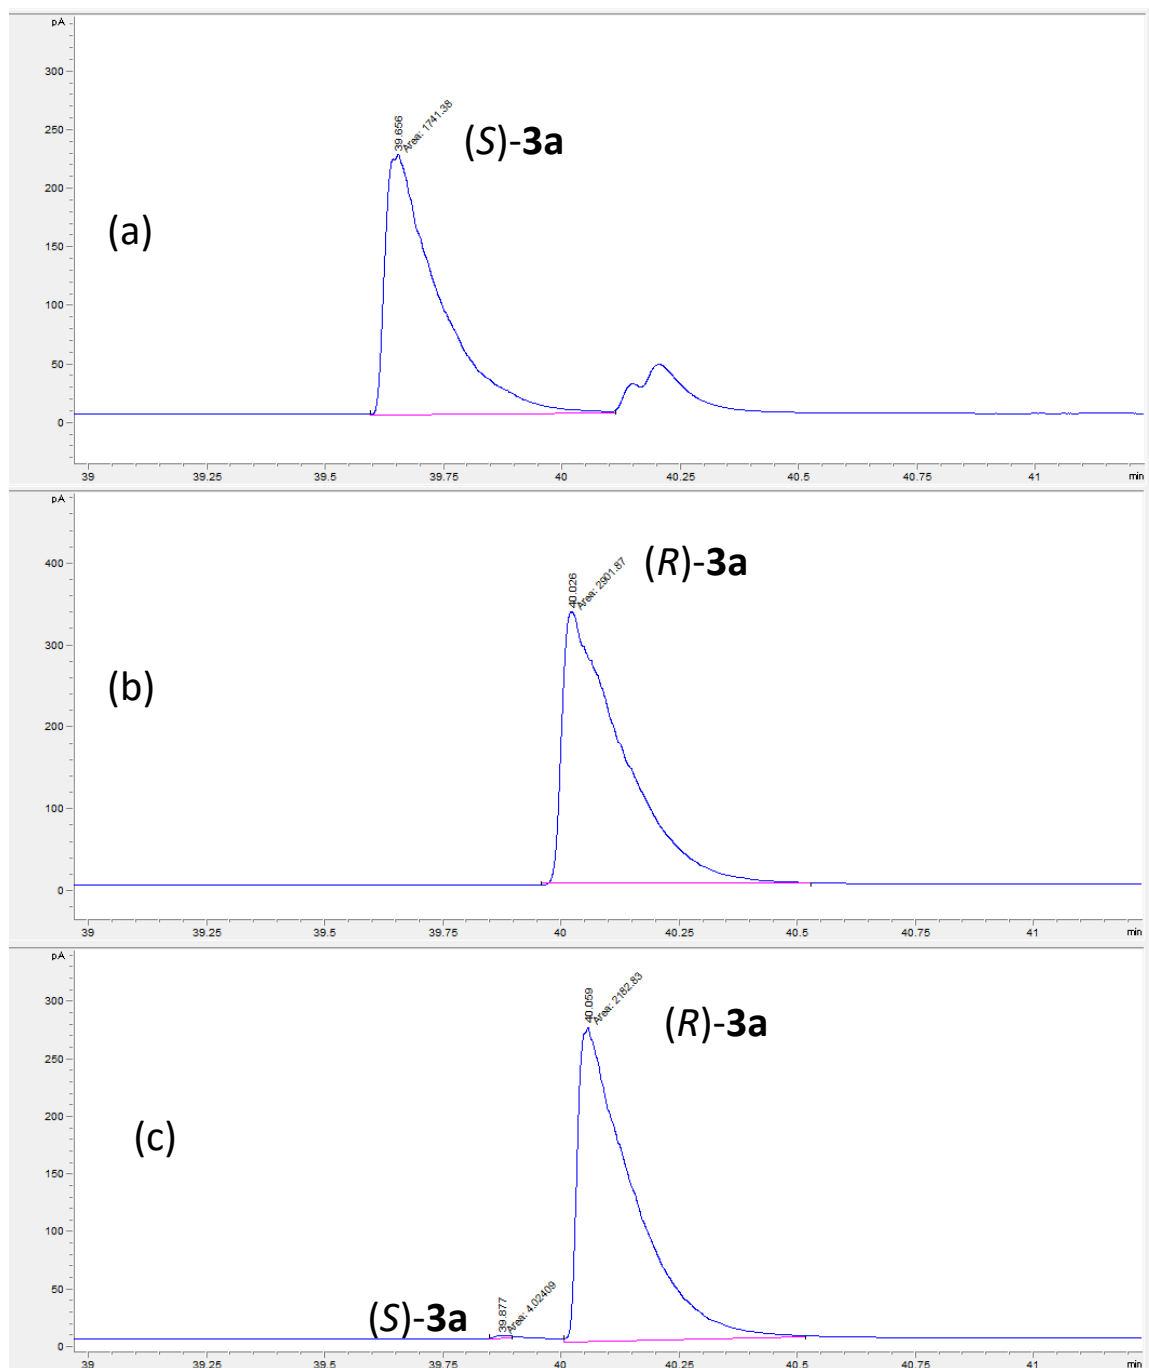

(2) Determination of the enantiomeric excess for the orthogonal-cascade to give (*R*)-**3b** as the final product

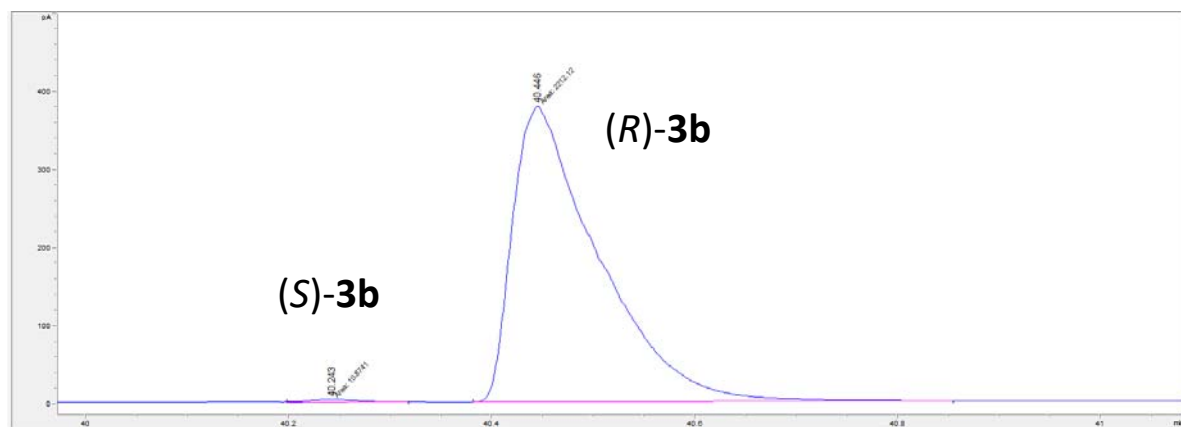

(3) (a) Reference compound: amine (*S*)-**3c** from reaction catalyzed by stereoselective  $\omega$ -transaminase. (b) Reference compound: amine (*R*)-**3c** from reaction catalyzed by stereoselective  $\omega$ -transaminase. (c) Determination of the enantiomeric excess for the orthogonal-cascade to give (*R*)-**3c** as the final product.

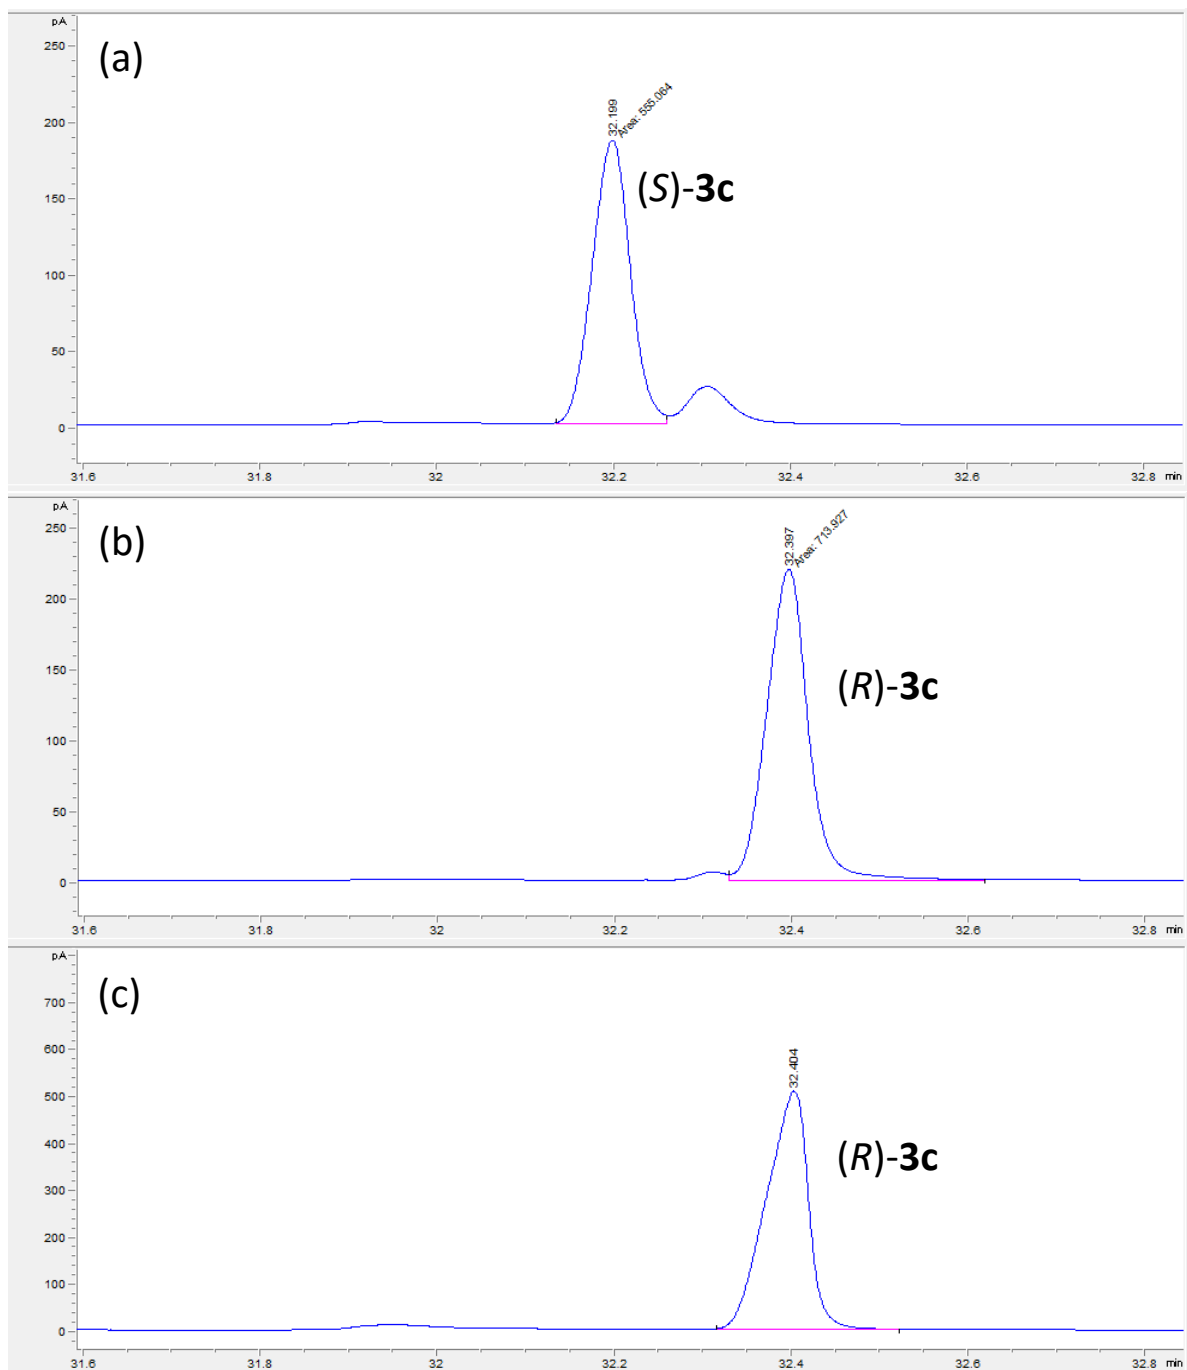



(4) (a) Reference compound: amine (*S*)-**3d** from reaction catalyzed by stereoselective  $\omega$ -transaminase. (b) Reference compound: amine (*R*)-**3d** from reaction catalyzed by stereoselective  $\omega$ -transaminase. (c) Determination of the enantiomeric excess for the orthogonal-cascade to give (*R*)-**3d** as the final product.

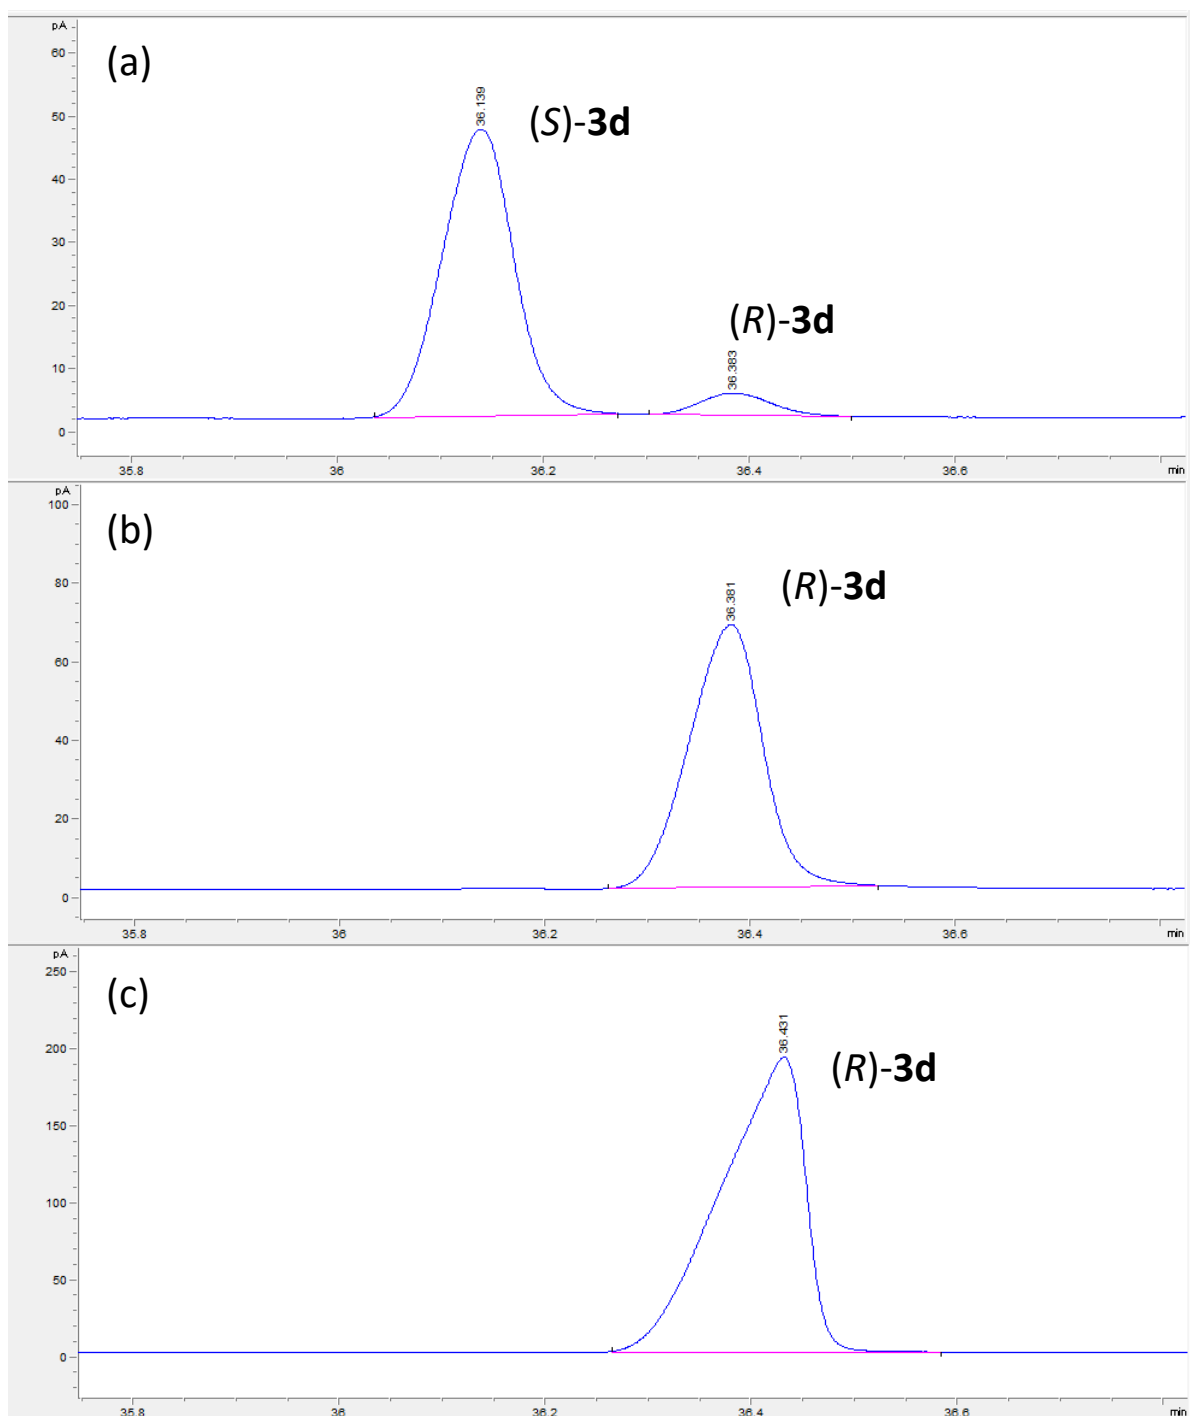

(5) (a) Reference compound: mixture of (*R,S*)-Amine-**3e** from reaction catalyzed by non selective  $\omega$ -transaminase. (b) Determination of the enantiomeric excess for the orthogonal-cascade to give (*R*)-**3e** as the final product.

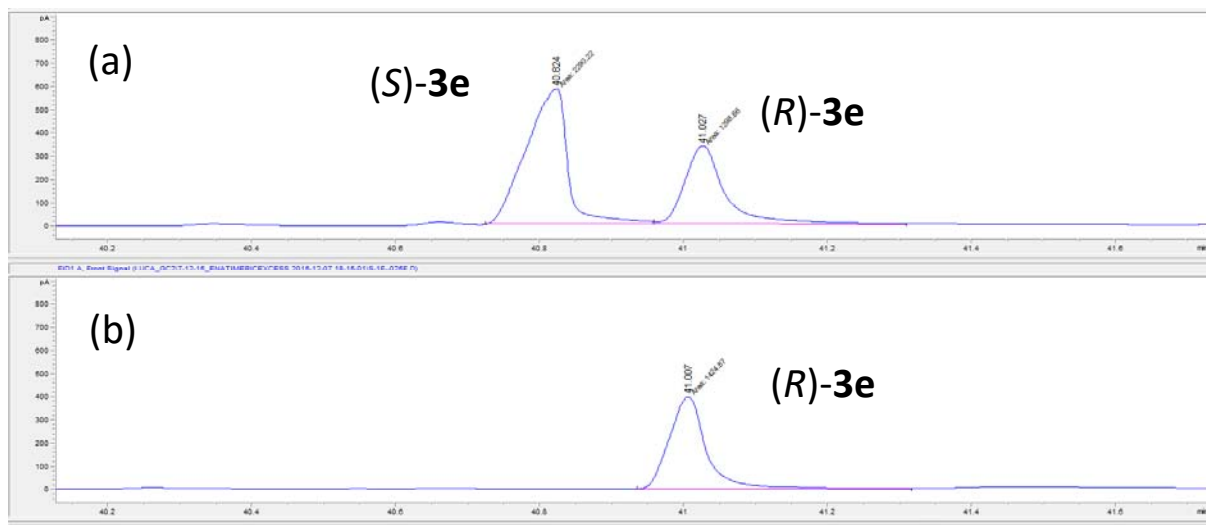

(6) (a) Reference compound: mixture of (*R,S*)-Amine-**3f** from commercially available racemic and enantiopure amine. (b) Determination of the enantiomeric excess for the orthogonal-cascade to give (*R*)-**3f** as the final product.

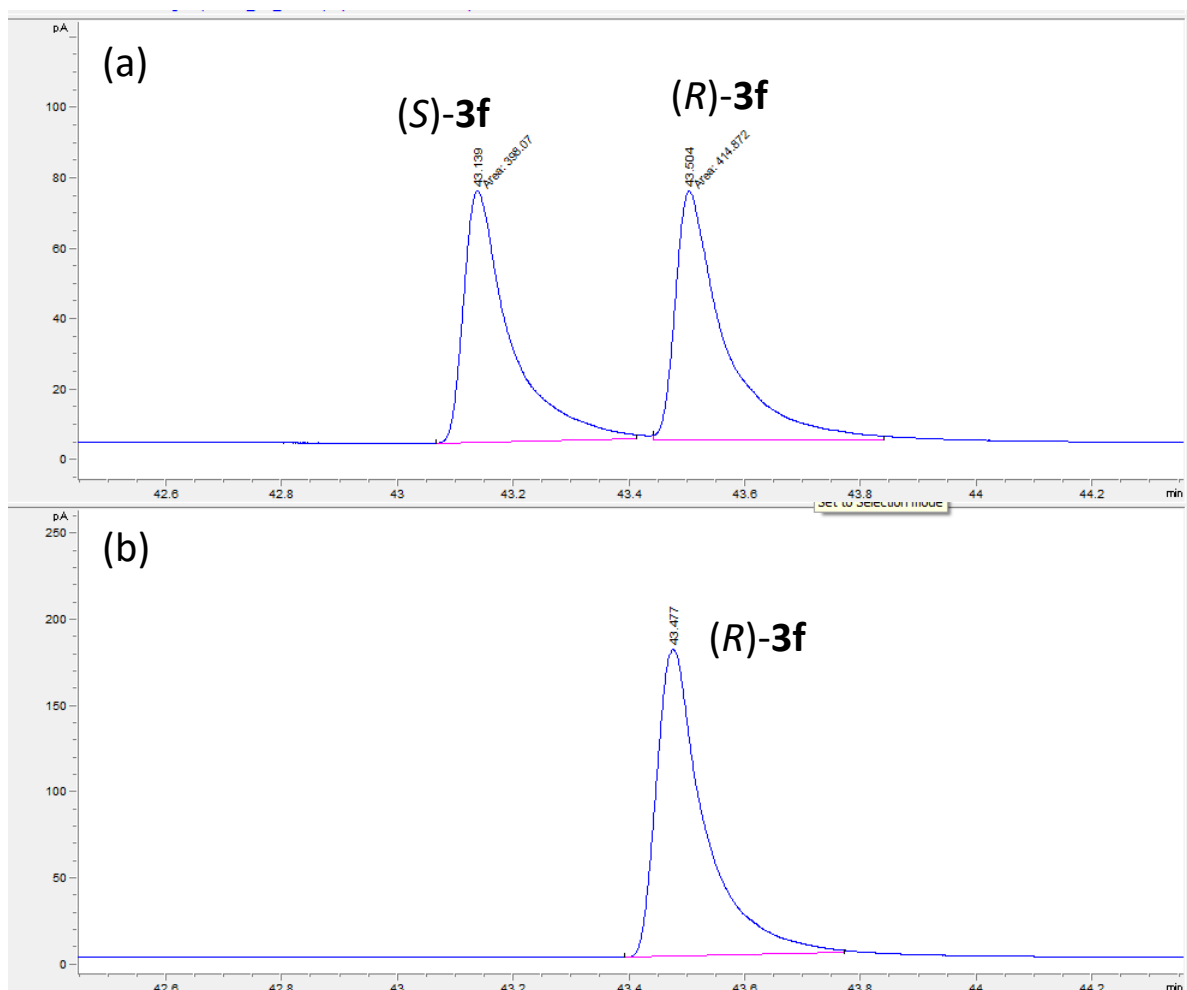

(7) (a) Reference compound: (*S*)-amine-**3g** from reaction catalyzed by stereoselective  $\omega$ -transaminase. (b) Reference compound: (*R*)-amine-**3g** from reaction catalyzed by stereoselective  $\omega$ -transaminase. (c) Determination of the enantiomeric excess for the orthogonal-cascade to give (*R*)-**3g** as the final product.

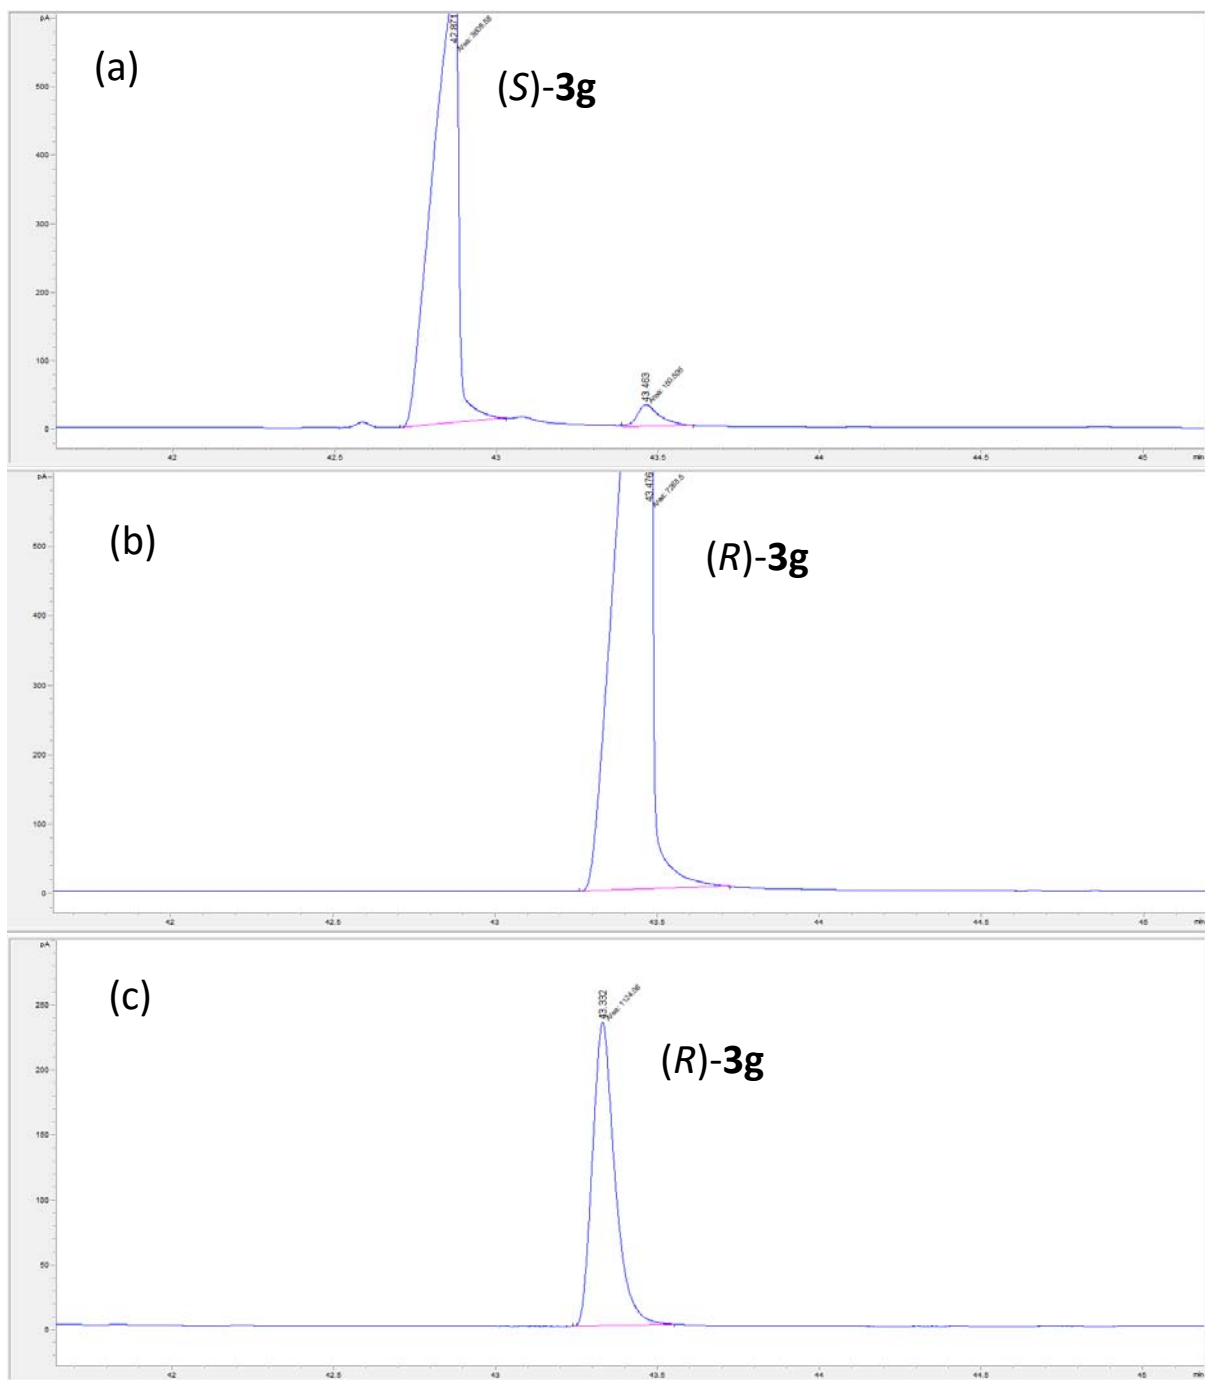

(8) (a) Reference compound: (*S*) amine-**3h** from reaction catalyzed by stereoselective  $\omega$ -transaminase. (b) Reference compound: (*R*) amine-**3h** from reaction catalyzed by selective  $\omega$ -transaminase. (c) Determination of the enantiomeric excess for the orthogonal-cascade to give (*R*)-**3h** as the final product.

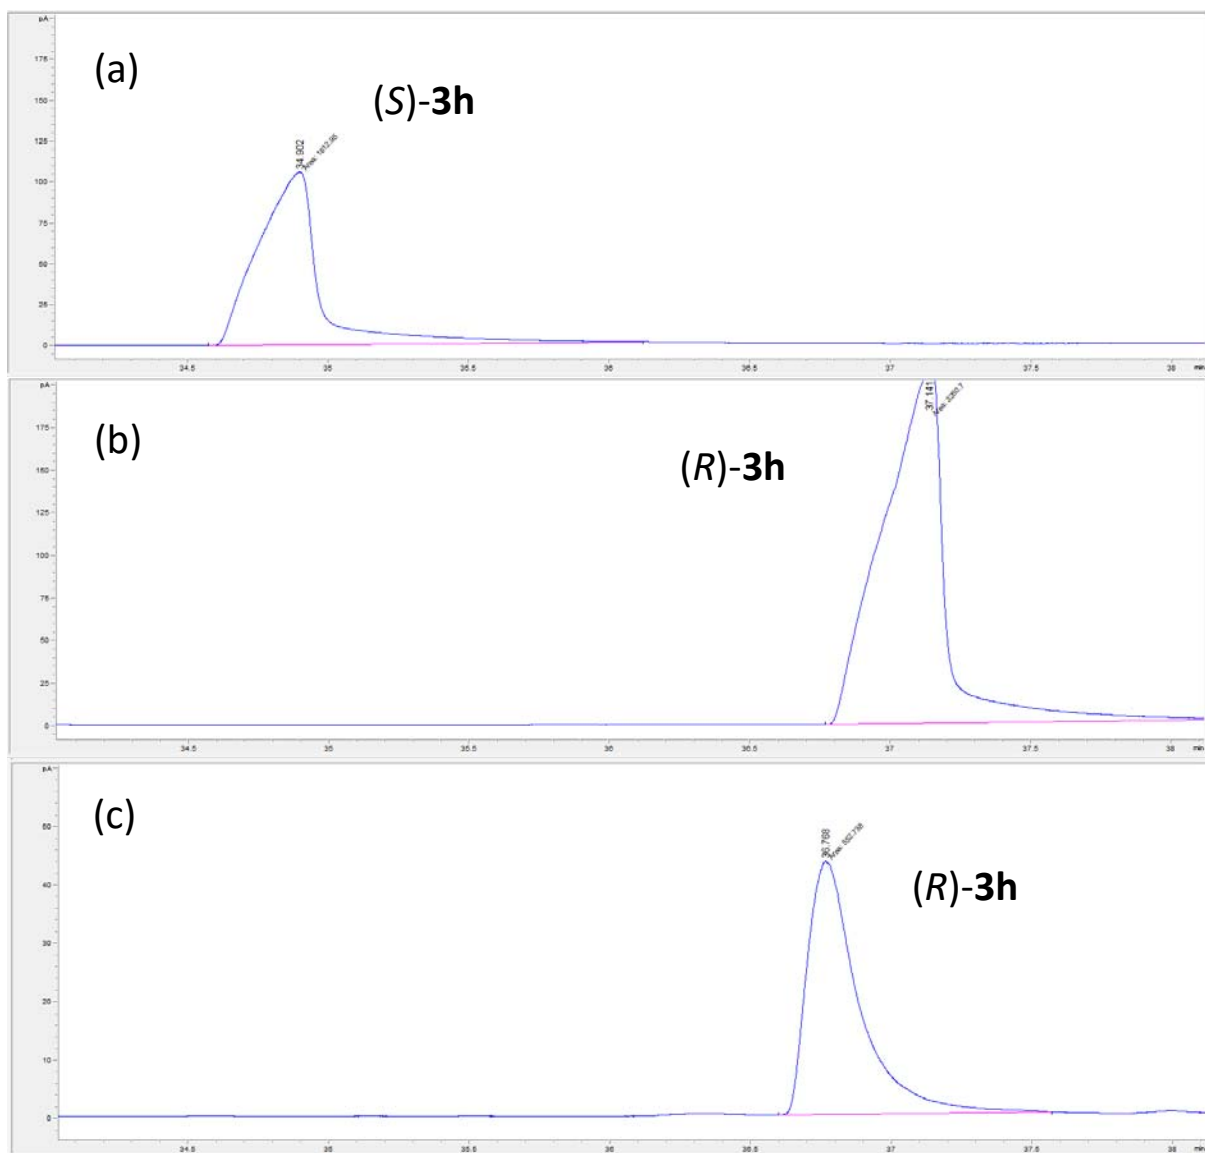

(9) (a) Reference compound: (*S*)-amine-**3i**, commercially available. (b) Reference compound: (*R*) amine-**3i**, commercially available. (c) Determination of the enantiomeric excess for the orthogonal-cascade to give (*R*)-**3i** as the final product.

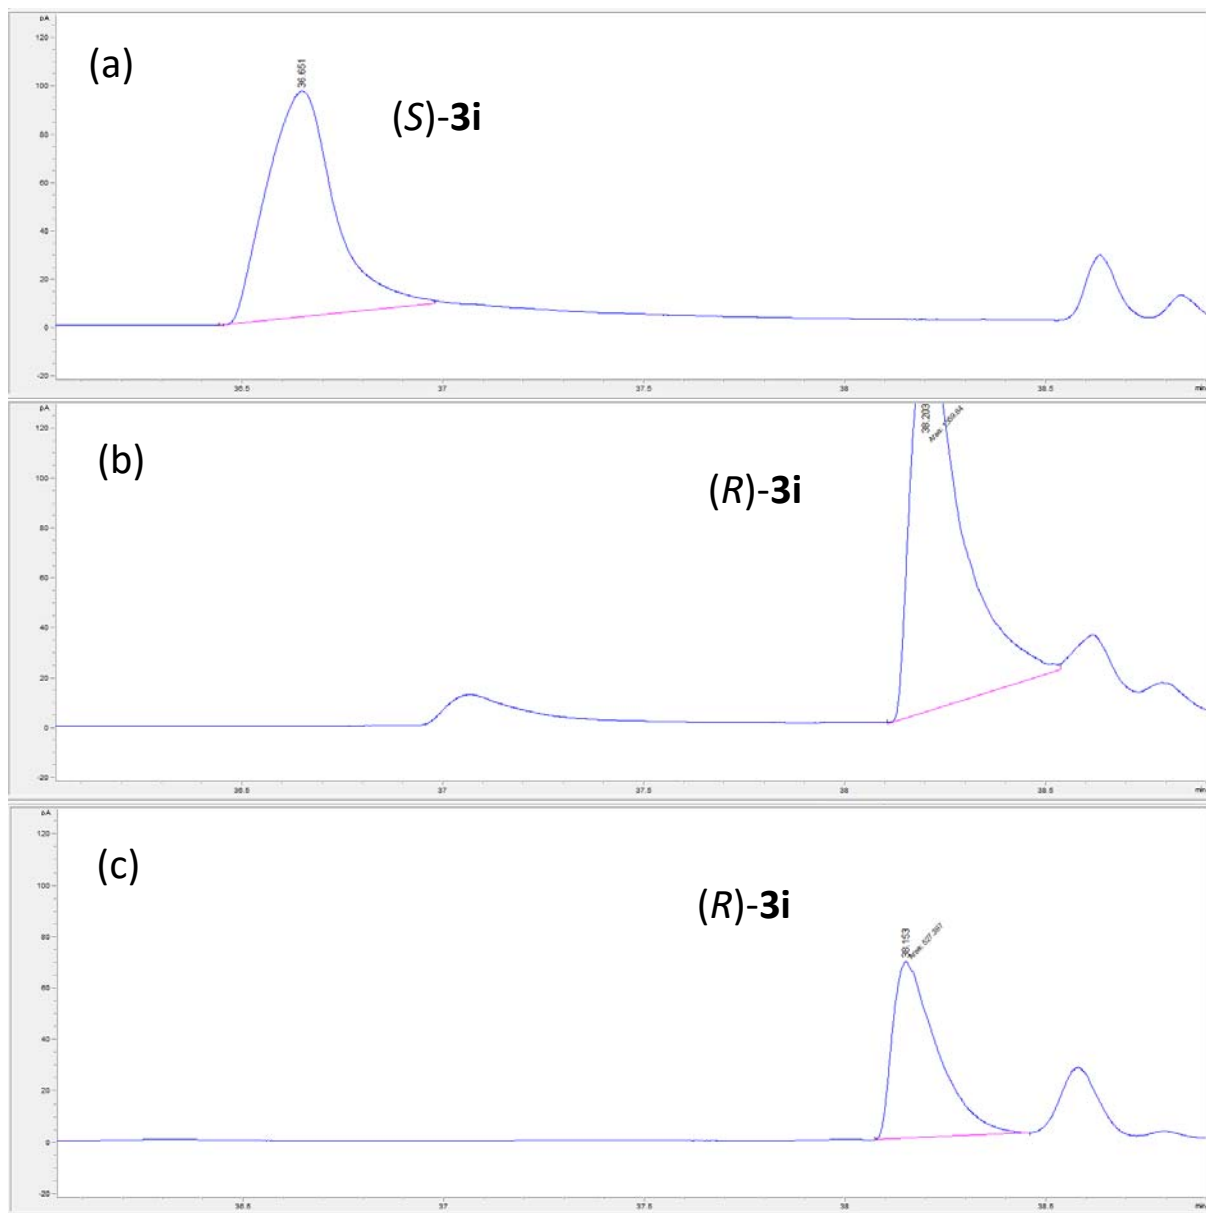

(10) (a) Reference compound: (*S*)-amine-**3j** from reaction catalyzed by stereoselective  $\omega$ -transaminase. (b) Reference compound: (*R*)-amine-**3j** from reaction catalyzed by stereoselective  $\omega$ -transaminase. (c) Determination of the enantiomeric excess for the orthogonal-cascade to give (*R*)-**3j** as the final product

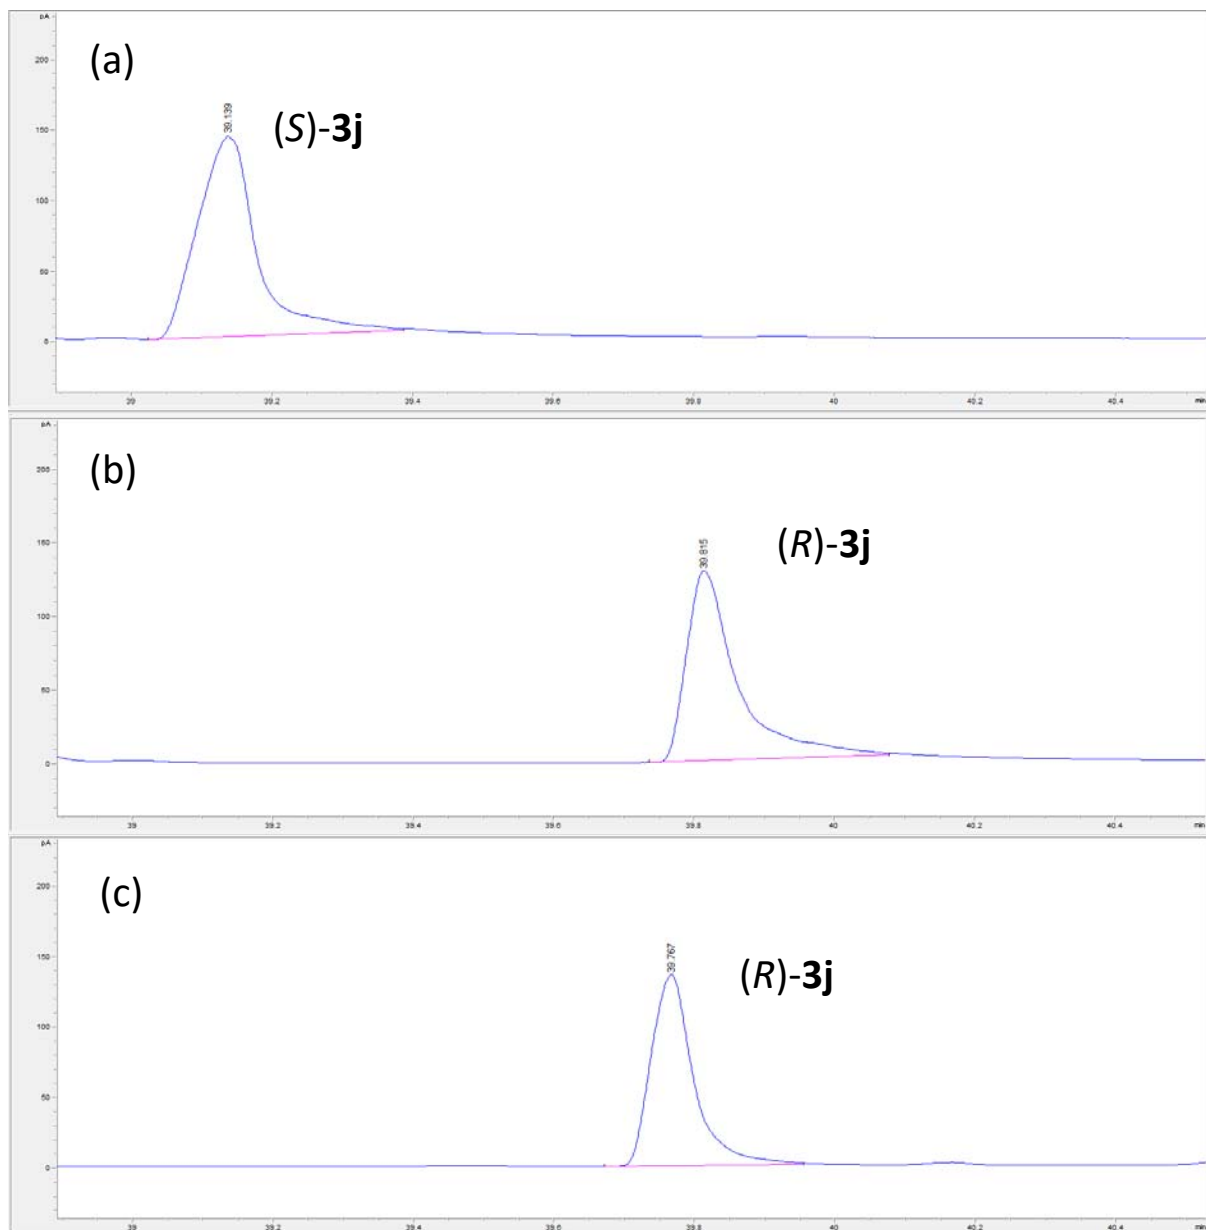

(11) (a) Reference compound: (*S*)-amine-**3k** from reaction catalyzed by stereoselective  $\omega$ -transaminase. (b) Reference compound: (*R*)-amine-**3k** from reaction catalyzed by stereoselective  $\omega$ -transaminase. (c) Determination of the enantiomeric excess for the orthogonal-cascade to give (*R*)-**3k** as the final product.

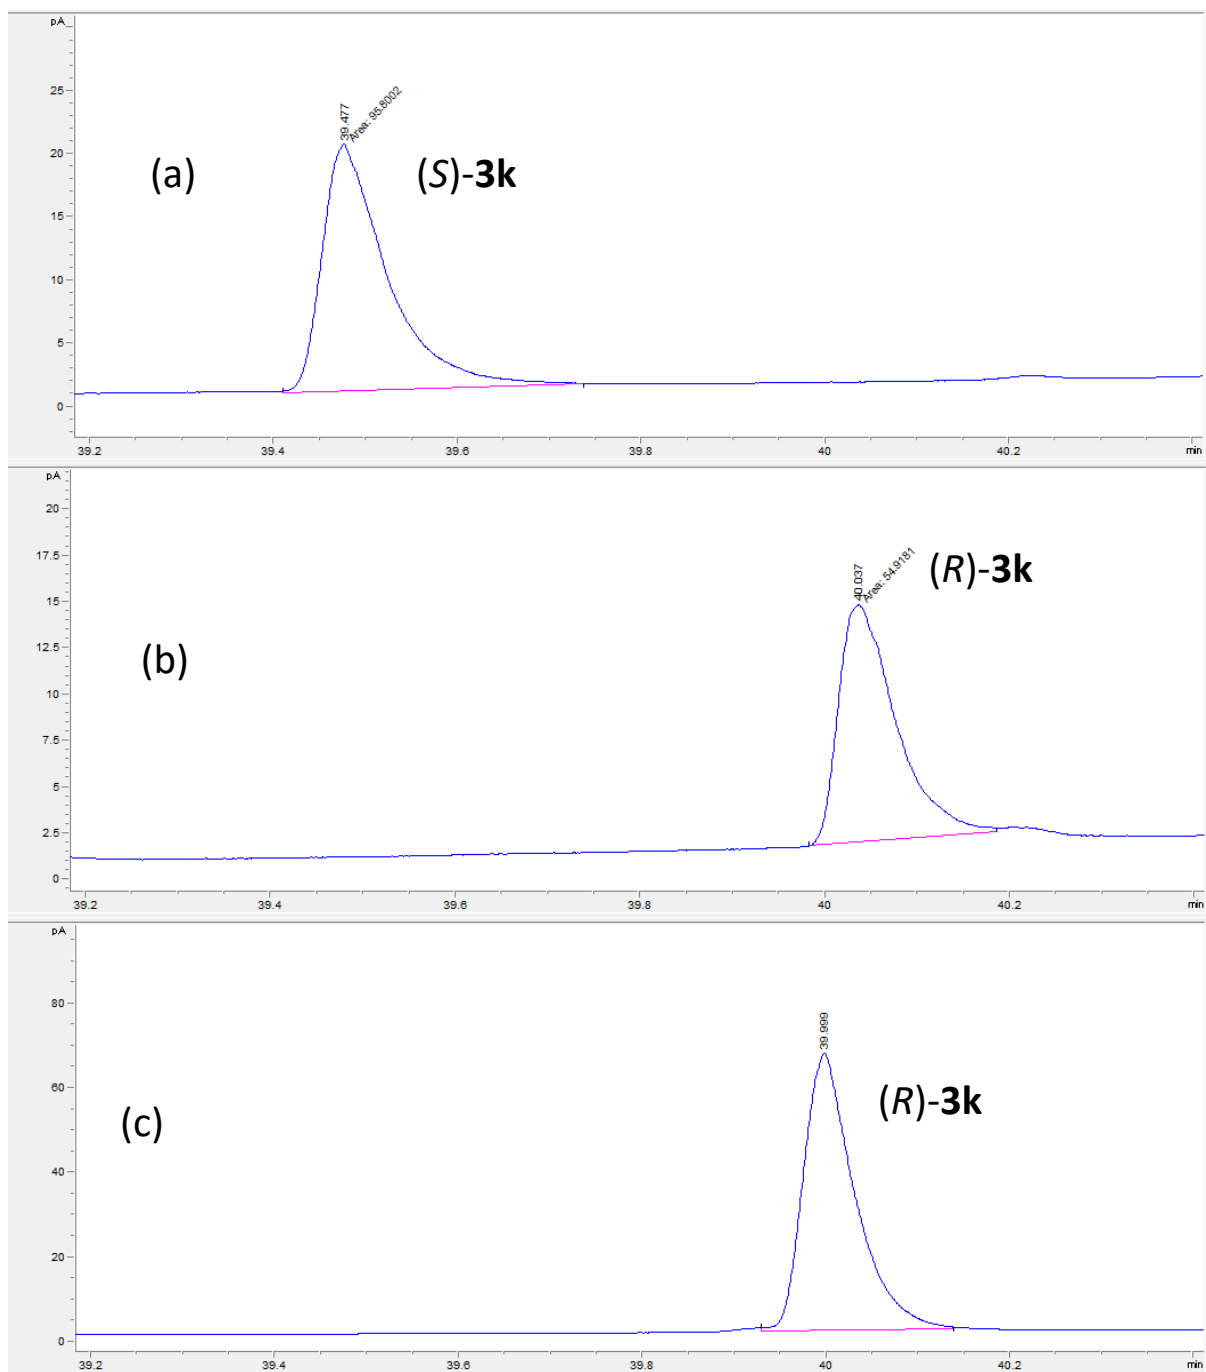

(12) (a) Reference compound: (*S*)-amine-**3I** from reaction catalyzed by stereoselective  $\omega$ -transaminase. (b) Reference compound: (*R*)-amine-**3I** from reaction catalyzed by stereoselective  $\omega$ -transaminase. (c) Determination of the enantiomeric excess for the orthogonal-cascade to give (*R*)-**3I** as the final product.

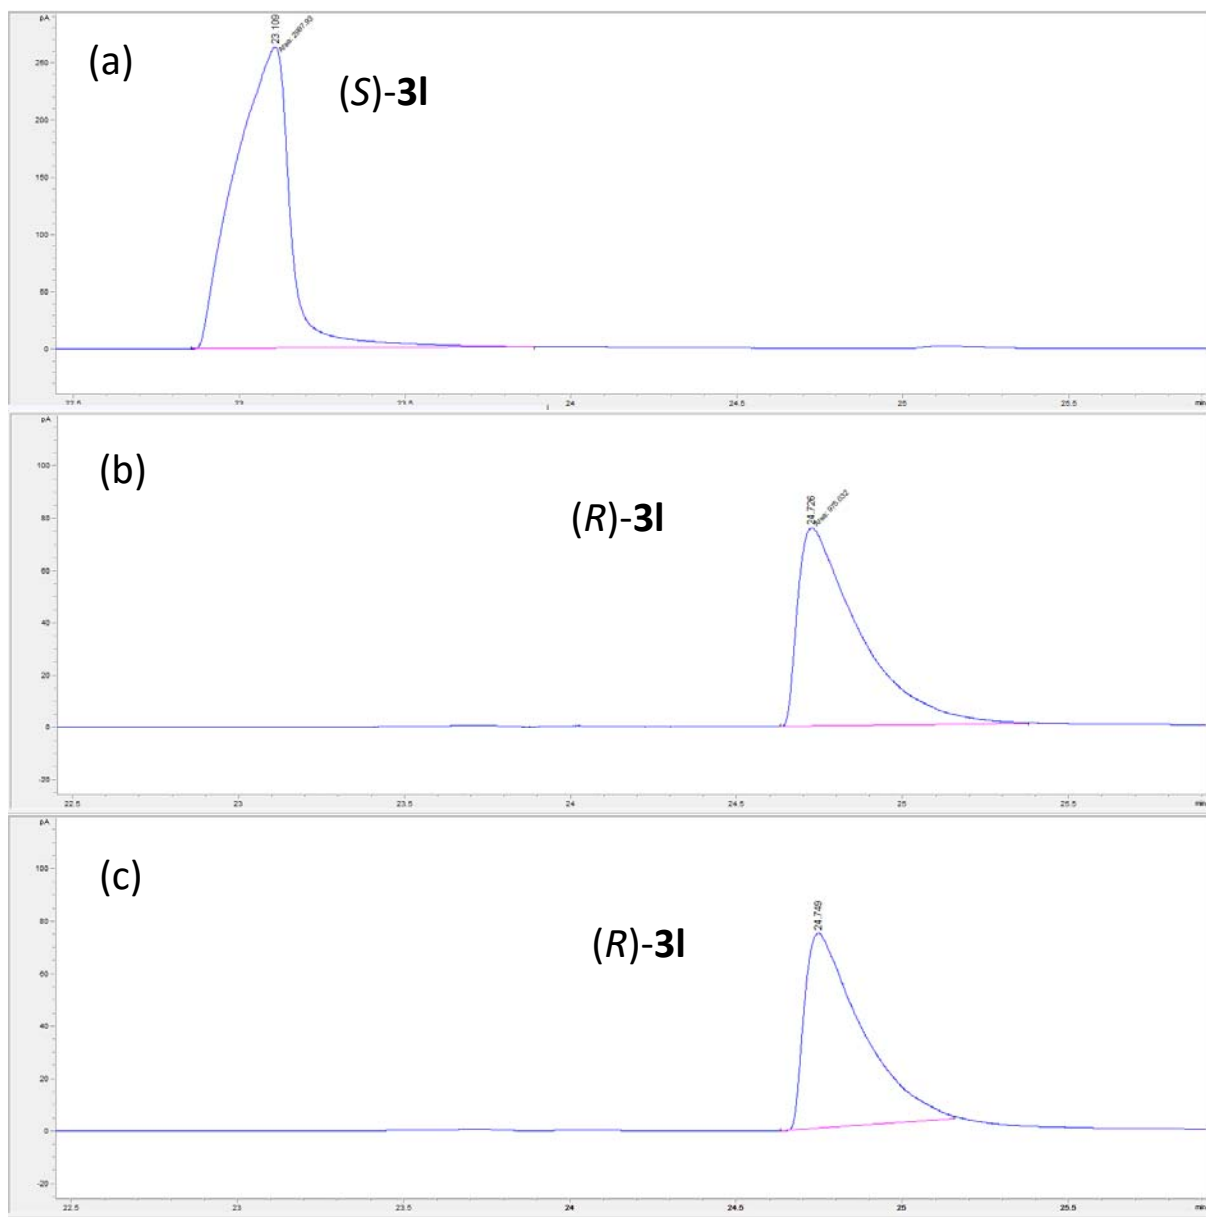



(13) (a) Reference compound: *racemic* (*R,S*)-**3m**. (b) Determination of the enantiomeric excess for the orthogonal-cascade to give (*R*)-**3m** as the final product

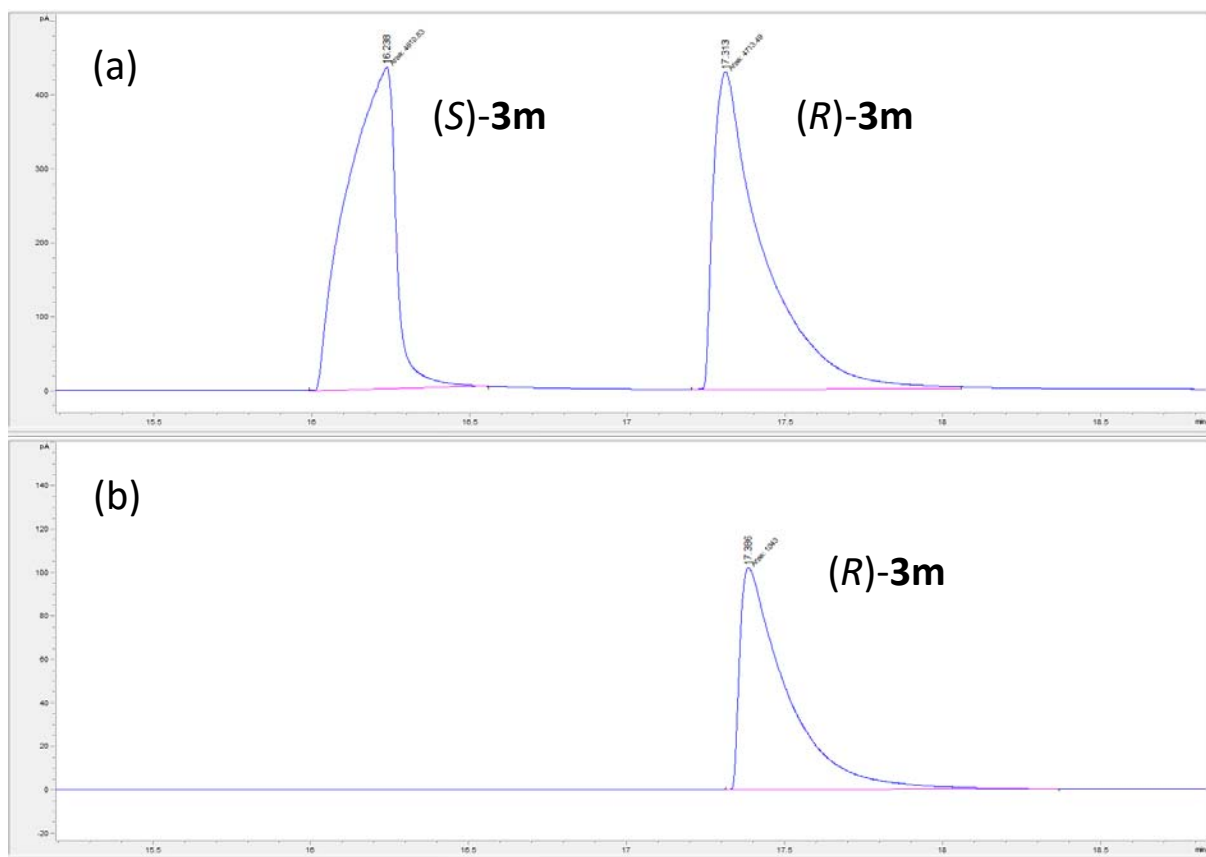

(14) (a) Reference compound: (*S*)-amine-**3n** from reaction catalyzed by stereoselective  $\omega$ -transaminase. (b) Reference compound: (*S*)-amine-**3n** from reaction catalyzed by stereoselective  $\omega$ -transaminase. (c) Determination of the enantiomeric excess for the orthogonal-cascade to give (*R*)-**3n** as the final product.

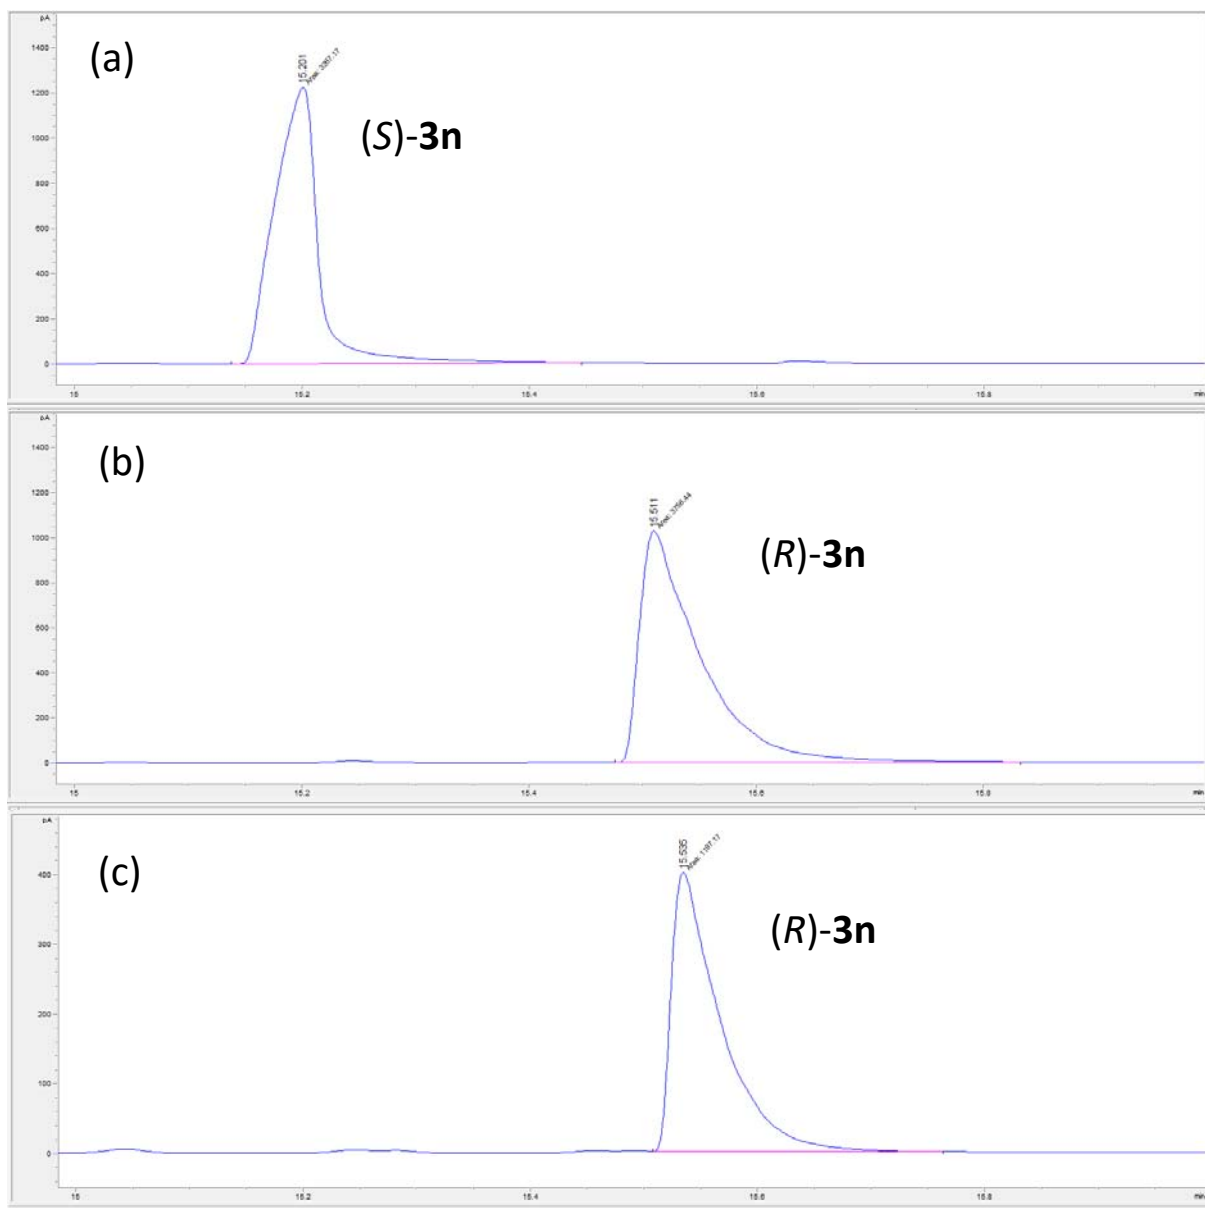

(15) (a) Reference compound: (*S*)-amine-**3o**, commercially available. (b) Reference compound: (*R*)-amine-**3o**, commercially available. (c) Determination of the enantiomeric excess for the orthogonal-cascade to give (*R*)-**3o** as the final product

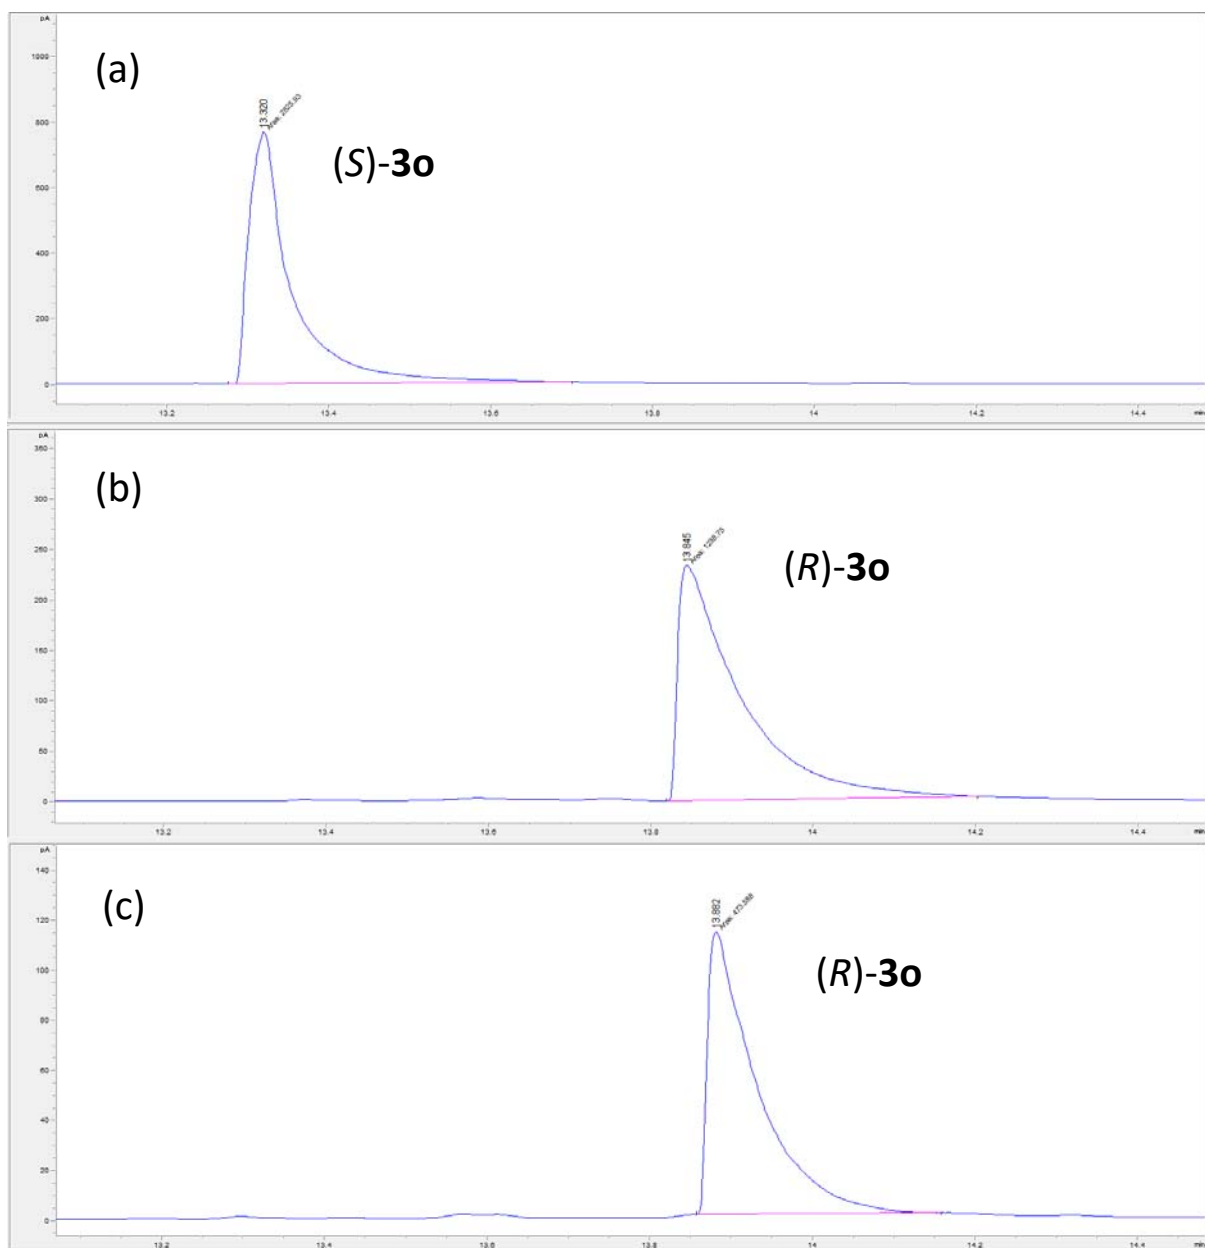

(16) (a) Reference compound: (*S*)-amine-**3p** from reaction catalyzed by stereoselective  $\omega$ -transaminase. (b) Reference compound: (*R*)-amine-**3p** from reaction catalyzed by stereoselective  $\omega$ -transaminase. (c) Determination of the enantiomeric excess for the orthogonal-cascade to give (*R*)-**3o** as the final product.

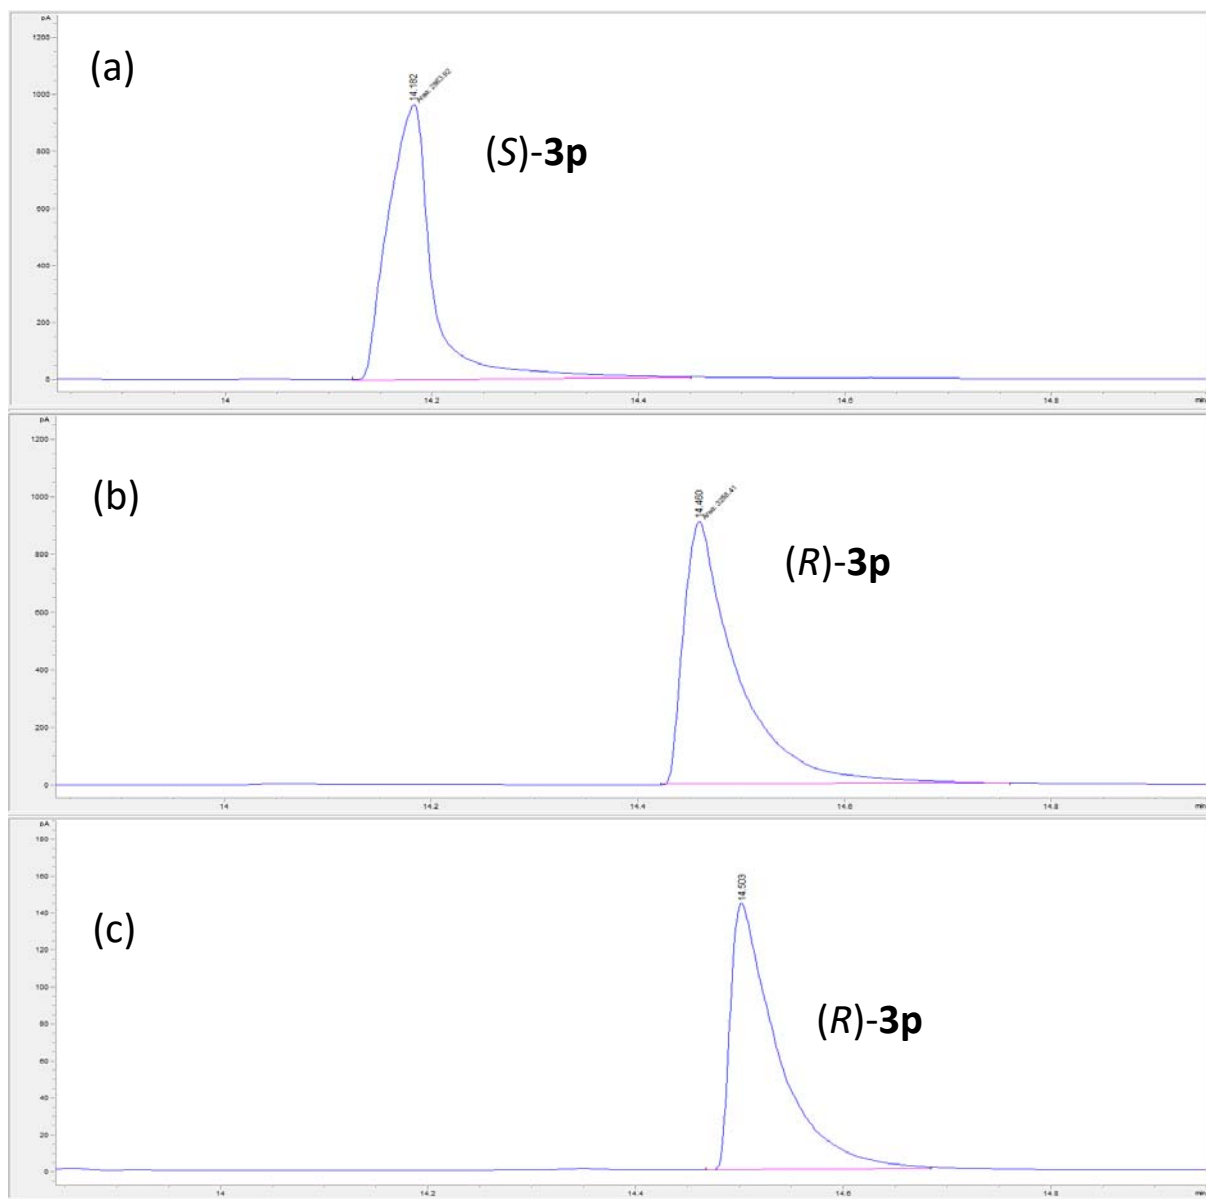

## 16. References

- (1) Lavandera, I.; Kern, A.; Ferreira-Silva, B.; Glieder, A.; de Wildeman, S.; Kroutil, W. *J. Org. Chem.* 2008, *73*, 6003-6005.
- (2) Koszelewski, D.; Lavandera, I.; Clay, D.; Rozzell, D.; Kroutil, W. *Adv. Synth. Catal.* 2008, *350*, 2761-2766.
- (3) Morokutti, A.; Lyskowski, A.; Sollner, S.; Pointner, E.; Fitzpatrick, T. B.; Kratky, C.; Gruber, K.; Macheroux, P. *Biochemistry* 2005, *44*, 13724-13733.
- (4) Mutti, F. G.; Knaus, T.; Scrutton, N. S.; Breuer, M.; Turner, N. J. *Science* 2015, *349*, 1525-1529.
- (5) Knaus, T.; Böhmer, W.; Mutti, F. G. *Green Chem.* 2017, *19*, 453-463.
- (6) <http://equilibrator.weizmann.ac.il/>.
- (7) Alberty, R. A. *Thermodynamics of biochemical reactions*; Wiley-Interscience, 2003.
- (8) Goldberg, R. N.; Tewari, Y. B.; Bhat, T. N. *Bioinformatics* 2004, *20*, 2874-2877.
